# Supplementary material for: Oxidation-induced C–H bond activation in iridium pincer complexes
Source: Royal Society of Chemistry journal article supplement (doi:10.1039/d3dt00903c), 2023-01-01
Supplement: d3dt00903c1.pdf [file d3dt00903c1.pdf]

## Oxidation-induced C-H bond activation in iridium pincer complexes

Alexey V. Polukeev\*<sup>a</sup> and Magdalena Tasić<sup>a</sup>

Centre for Analysis and Synthesis, Department of Chemistry, Lund University, P.O. Box 124, SE-221 00 Lund, Sweden. E-mail: alexey.polukeev@chem.lu.se.

### Supporting Information

#### Table of Contents

|                                                                          |     |
|--------------------------------------------------------------------------|-----|
| 1. Observation of other plausible oxidation-induced C-H bond activations | S1  |
| 2. Additional Electrochemical Data                                       | S2  |
| 3. NMR spectra of the new compounds                                      | S5  |
| 4. Additional Computational Data                                         | S10 |

#### 1. Observation of other plausible oxidation-induced C-H bond activations

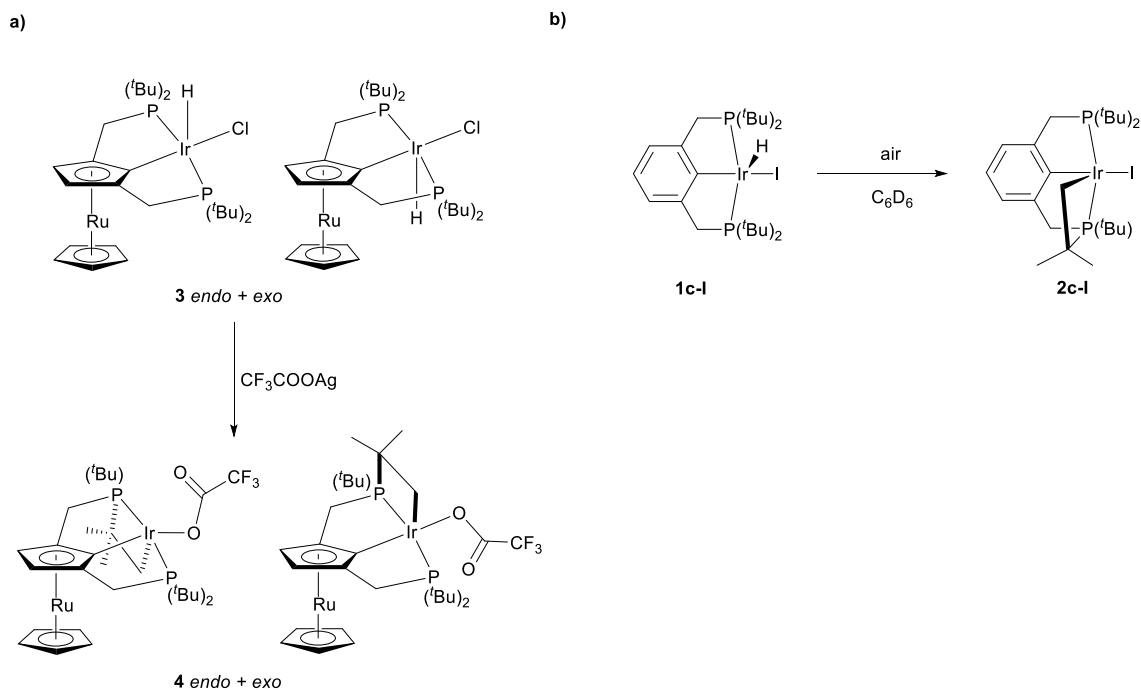

**Scheme S1.** Observation of other plausible oxidation-induced C-H bond activations.

a) Addition of the  $\text{CF}_3\text{COOAg}$  to the  $\text{CDCl}_3$  solution of ruthenocene-based complex **3** resulted in the disappearance of signals of **3** and formation of the two AX-systems in the  $^{31}\text{P}\{^1\text{H}\}$  NMR

spectrum (85.2 and 25.3 ppm, d,  $^2J_{PP} = 346.6$  Hz; 76.4 and 36.0 ppm, d,  $^2J_{PP} = 332.2$  Hz) lacking any detectable hydride resonances in the  $^1\text{H}$  NMR spectrum. We ascribe these signals to the type **4** structures with *exo* and *endo* cyclometallated *tert*-butyl groups (Scheme S1); unfortunately, **4** appeared to be unstable and decomposed during purification attempt.

b) A solution of (PCP)IrHI (**1c-I**) in  $\text{C}_6\text{D}_6$  in the NMR tube was left for ca. 4 weeks, with the standard plastic cap allowing the inert atmosphere to be substituted with air. The starting material was fully consumed and compound **2c-I** was formed in more than 80% NMR yield.  $^1\text{H}$  NMR (400 MHz,  $\text{C}_6\text{D}_6$ )  $\delta$  7.22-7.08 (m, overlapping, 3 H, Ar-H), 3.56 (ddd,  $J_1 = 6.3$  Hz,  $J_2 = 5.1$  Hz,  $J_3 = 1.5$  Hz, 1H, Ir-CH<sub>2</sub>-), 3.38 – 2.83 (m, 4H, -CH<sub>2</sub>-P), 1.93 (ddd,  $J_1 = 7.7$ ,  $J_2 = 5.1$  Hz,  $J_3 = 2.8$  Hz, 1H, Ir-CH<sub>2</sub>-), 1.44 (d,  $^3J_{PH} = 13.8$  Hz, 9H, -C(CH<sub>3</sub>)<sub>3</sub>), 1.39 (d,  $^3J_{PH} = 13.8$  Hz, 3H, -CH<sub>3</sub>), 1.28 (d,  $^3J_{PH} = 13.0$  Hz, 9H, -C(CH<sub>3</sub>)<sub>3</sub>), 1.09 (d,  $^3J_{PH} = 12.5$  Hz, 9H, -C(CH<sub>3</sub>)<sub>3</sub>), 0.62 (d,  $^3J_{PH} = 12.7$  Hz, 3H, -CH<sub>3</sub>).  $^{31}\text{P}$  NMR (162 MHz,  $\text{C}_6\text{D}_6$ )  $\delta$  48.69 (d,  $^2J_{PP} = 339.4$  Hz), 8.57 (d,  $^2J_{PP} = 339.4$  Hz).

## 2. Additional Electrochemical Data

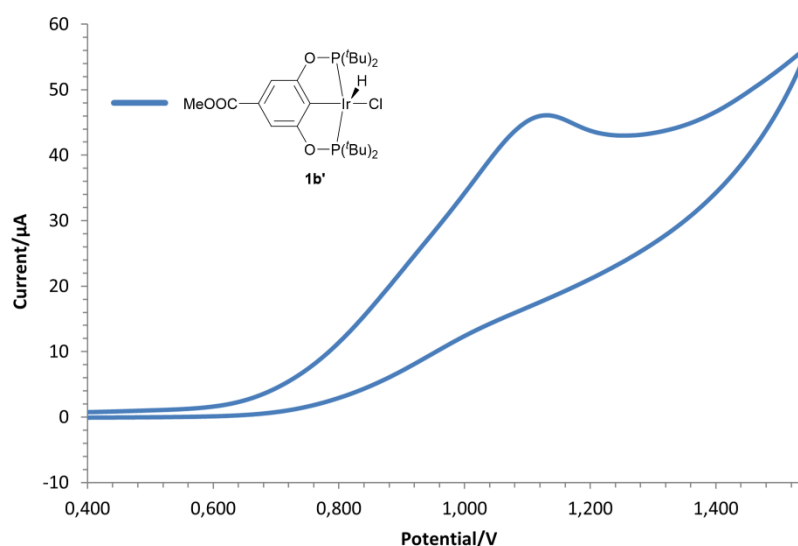

**Figure S1.** Cyclic voltammogram of **1b'** in THF, scan rate 0.05 V/s.

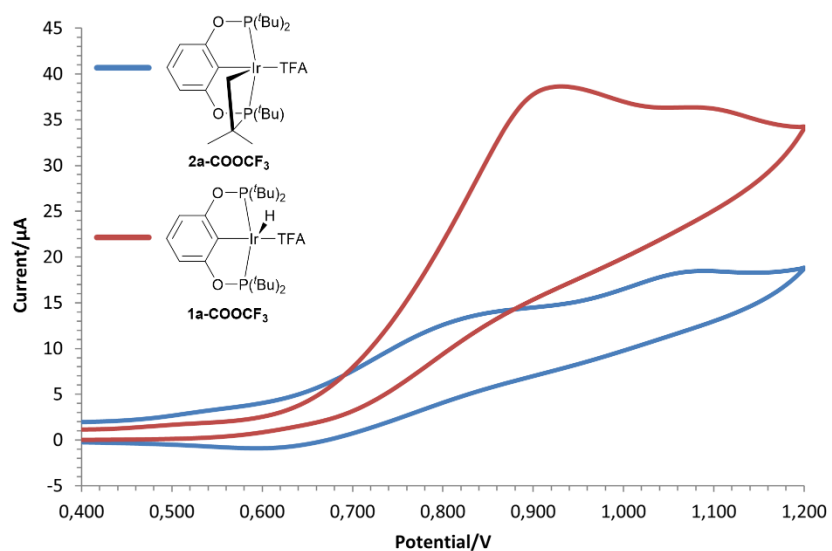

**Figure S2.** Cyclic voltammograms of complexes **1a-COOCF<sub>3</sub>** and **2a-COOCF<sub>3</sub>** in THF, scan rate 0.05 V/s.

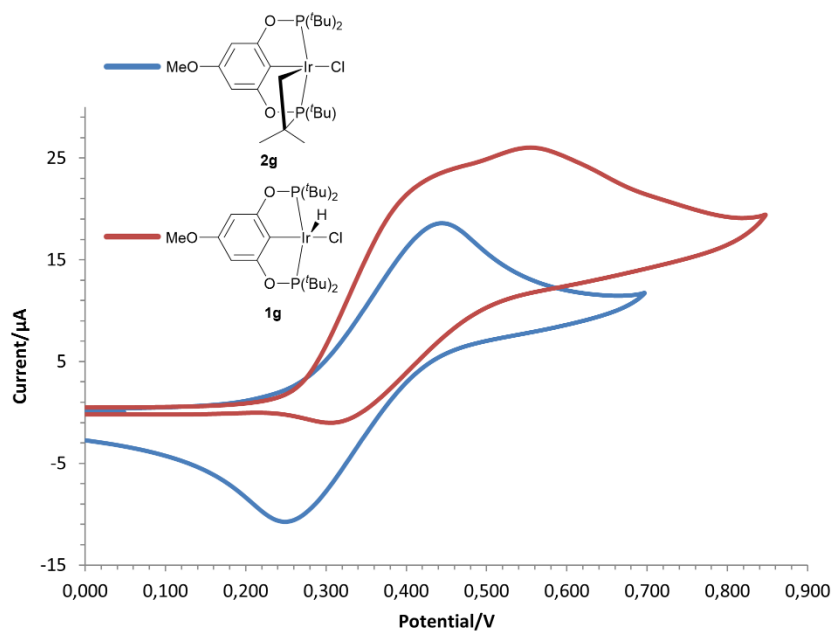

**Figure S3.** Cyclic voltammograms of complexes **1g** and **2g** in THF, scan rate 0.05 V/s.

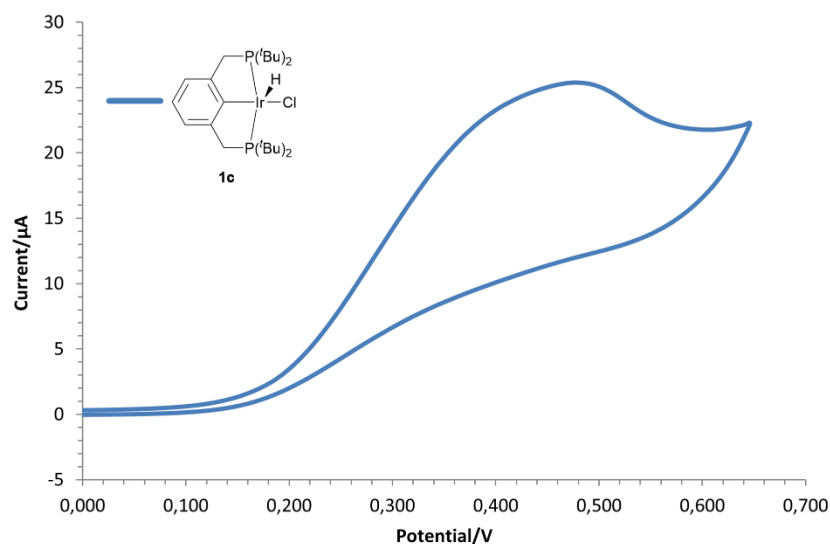

**Figure S4.** Cyclic voltammogram of complexes **1c** in THF, scan rate 0.05 V/s.

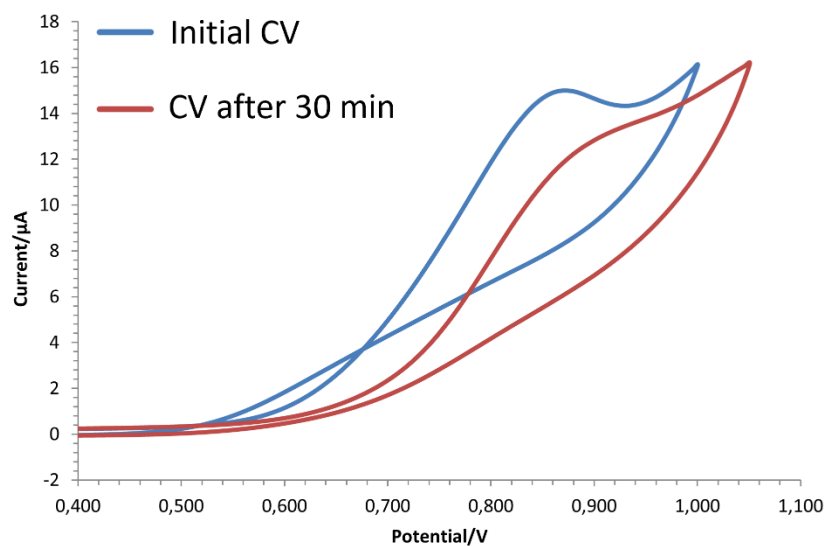

**Figure S5.** Two cyclic voltammograms of complex **1a** recorded with ca. 30 min time gap. The second CV demonstrates weaker oxidation wave, that is presumably associated with adsorption of **1a** or its oxidation products on the electrode. If CVs are extended to negative potential (-2.5...-3 V), a much better stability of CVs with time is observed.

### 3. NMR spectra of the new compounds

Note that the high-field hydride resonance is not fully decoupled in the  $^3\text{P}\{^1\text{H}\}$  NMR spectrum

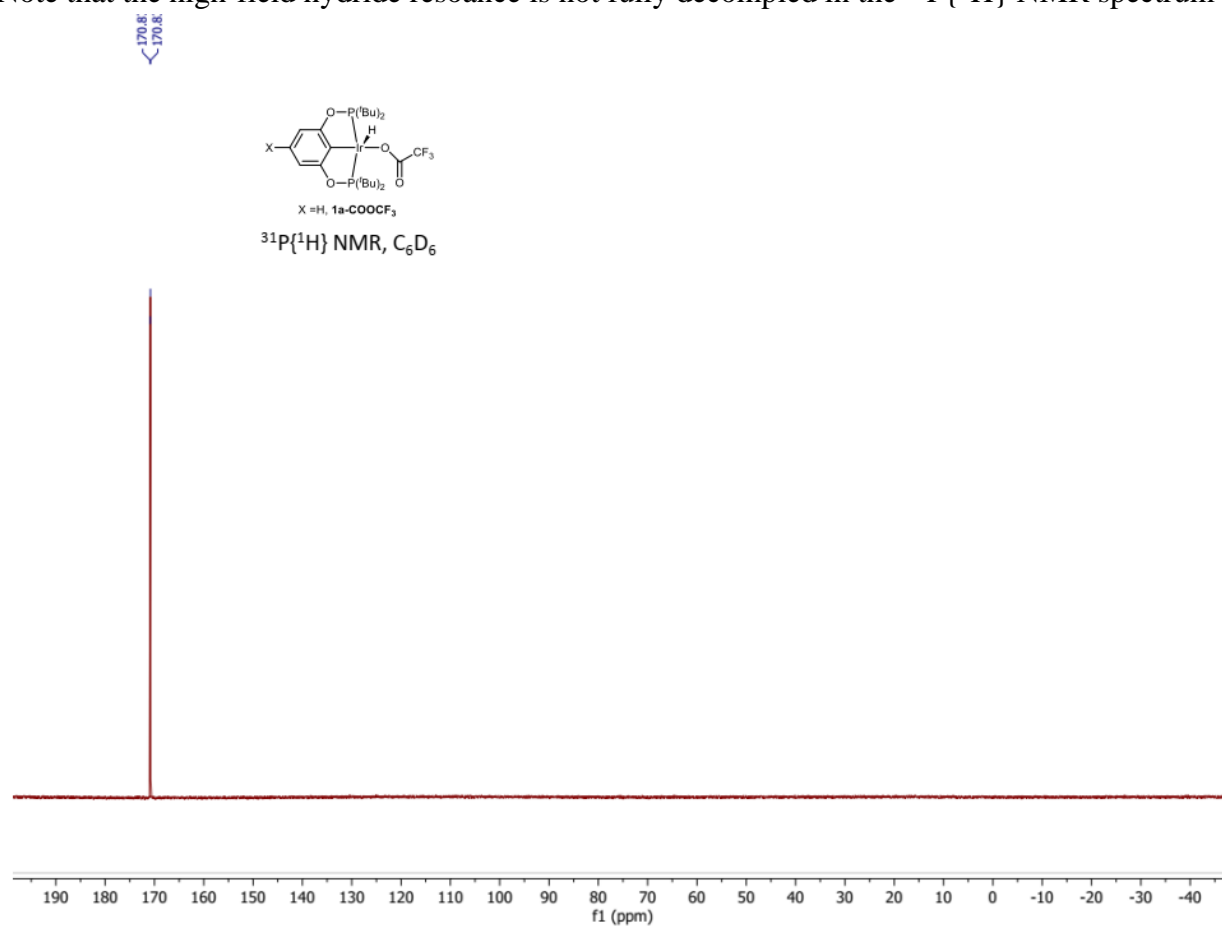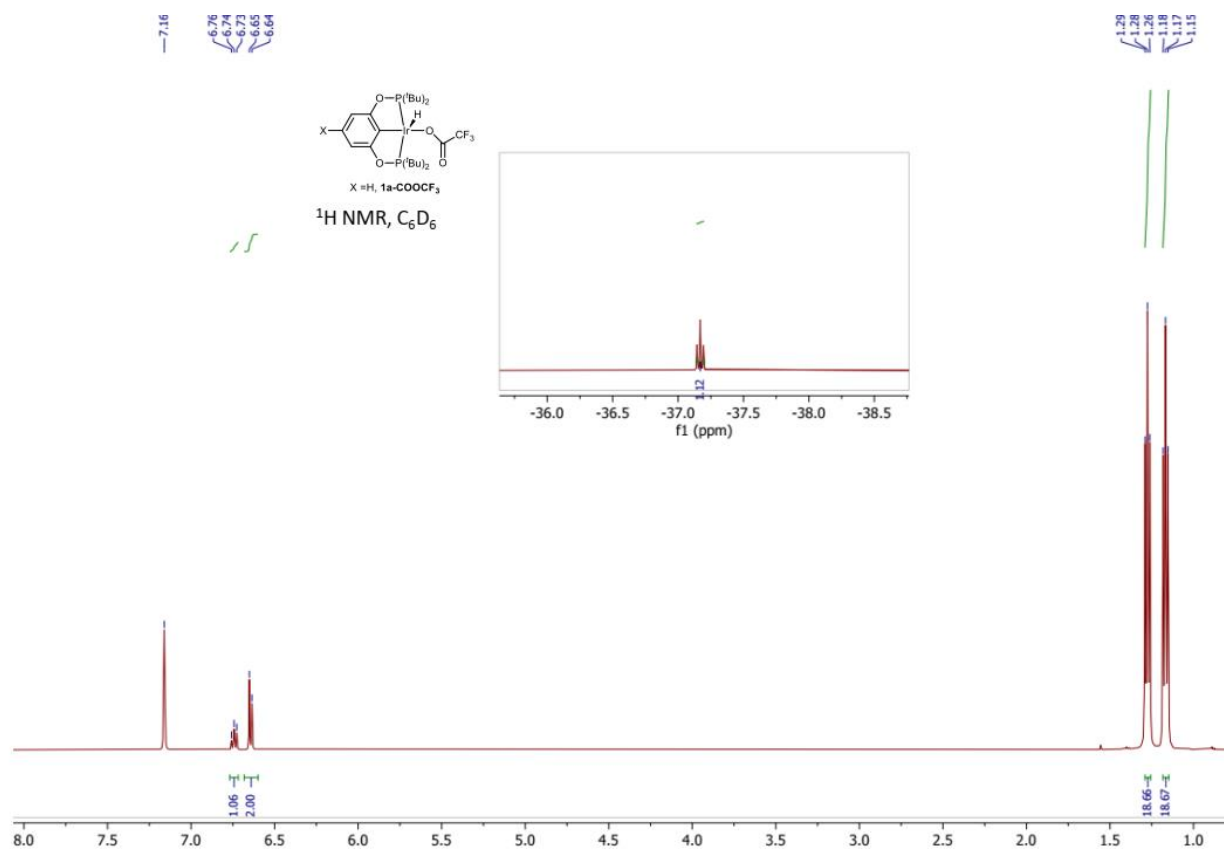

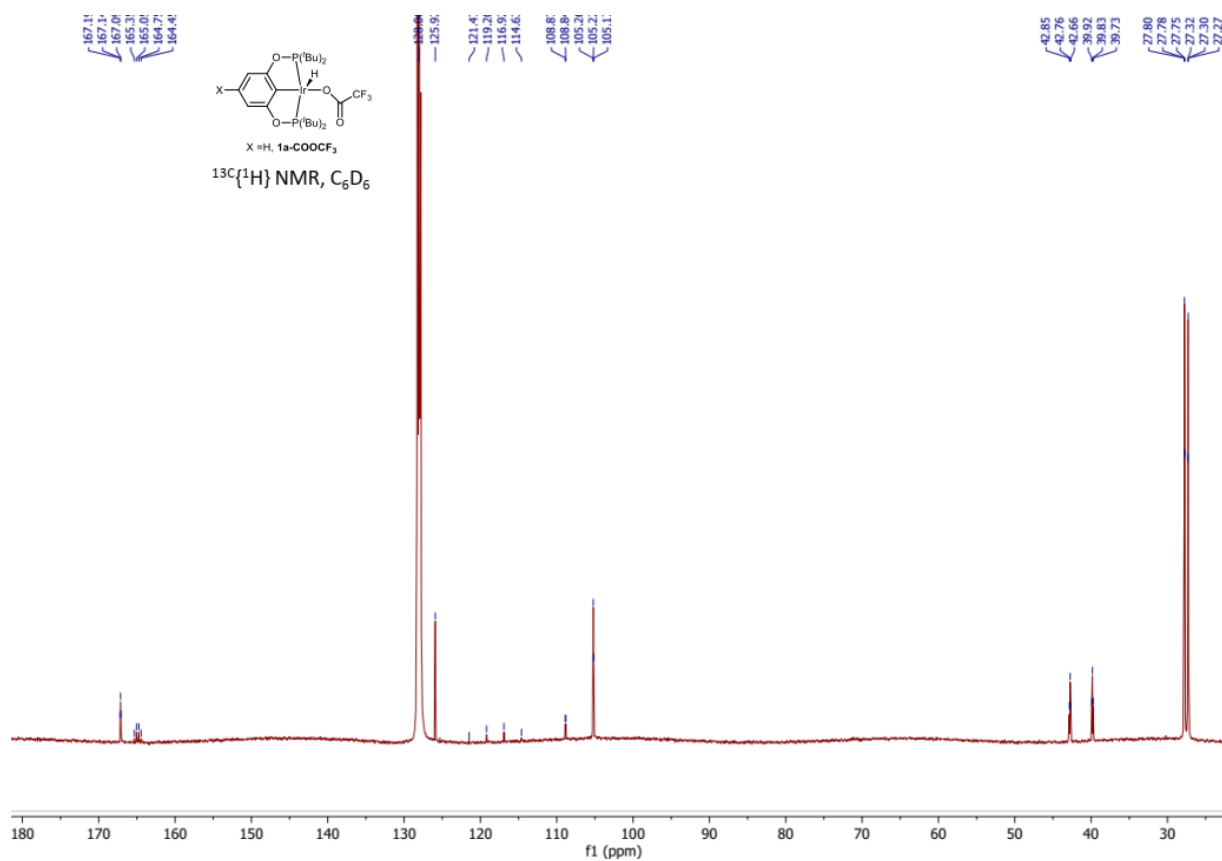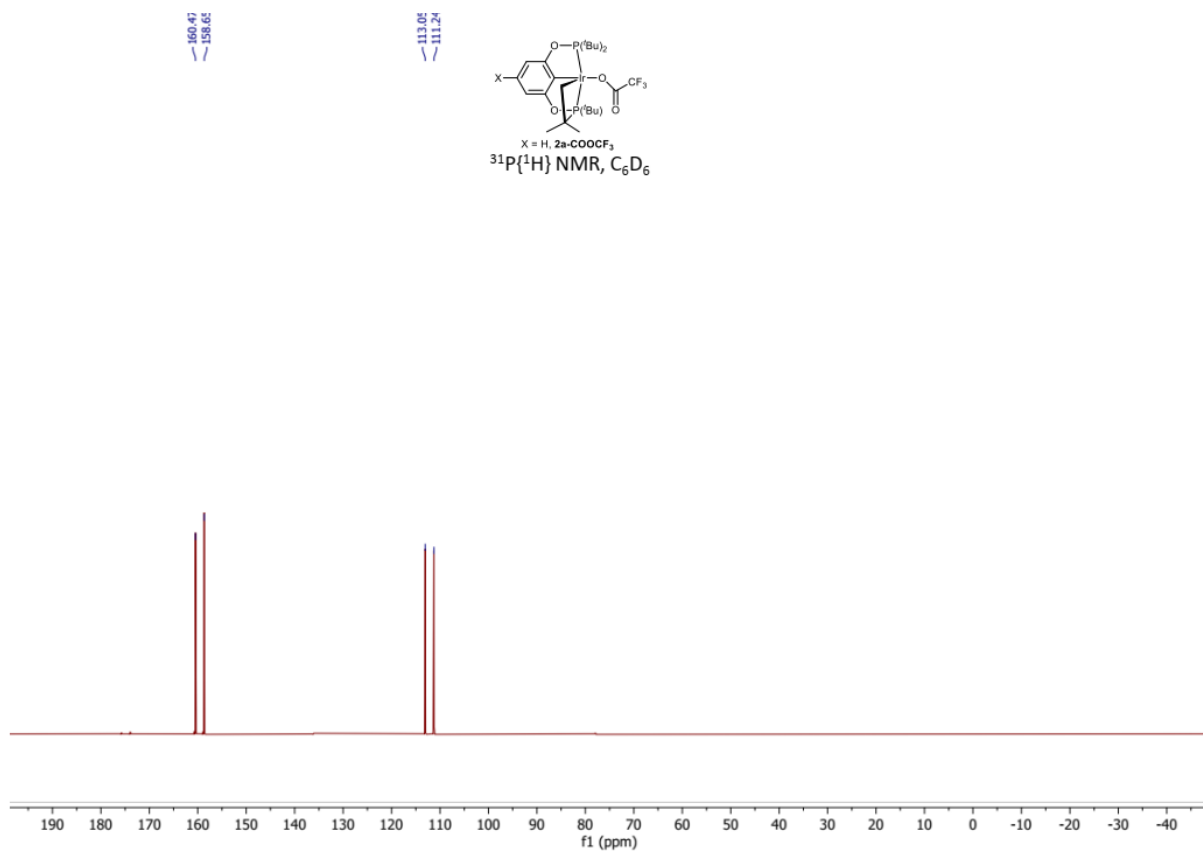

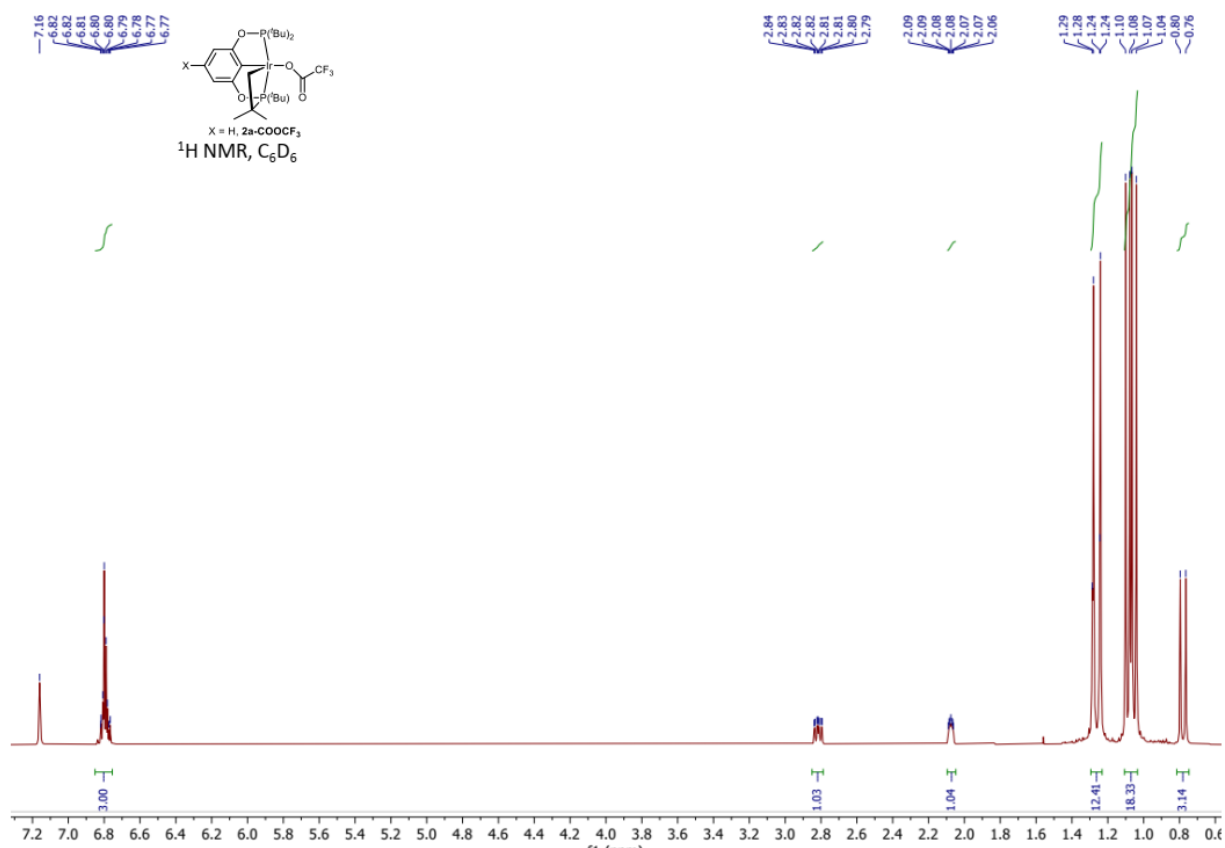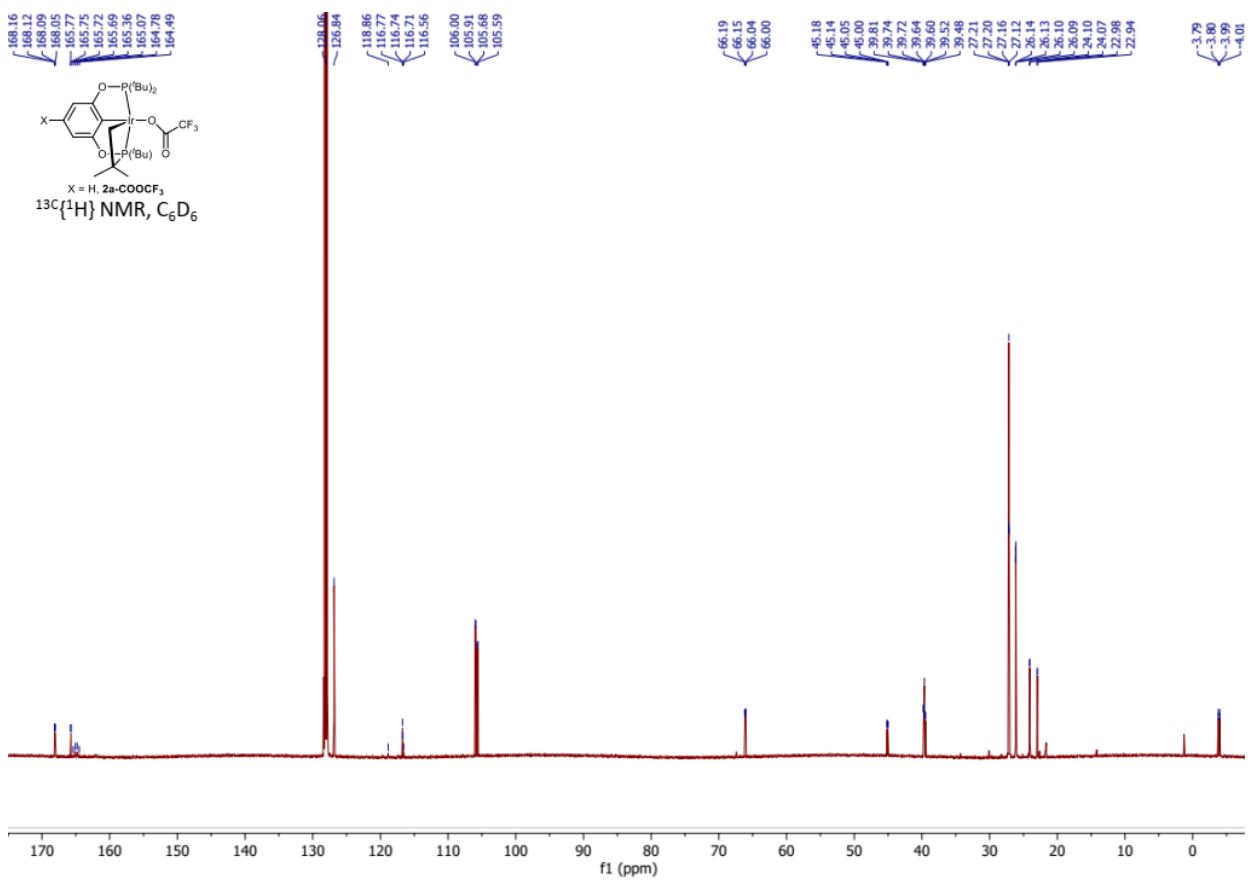

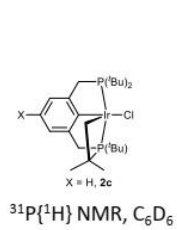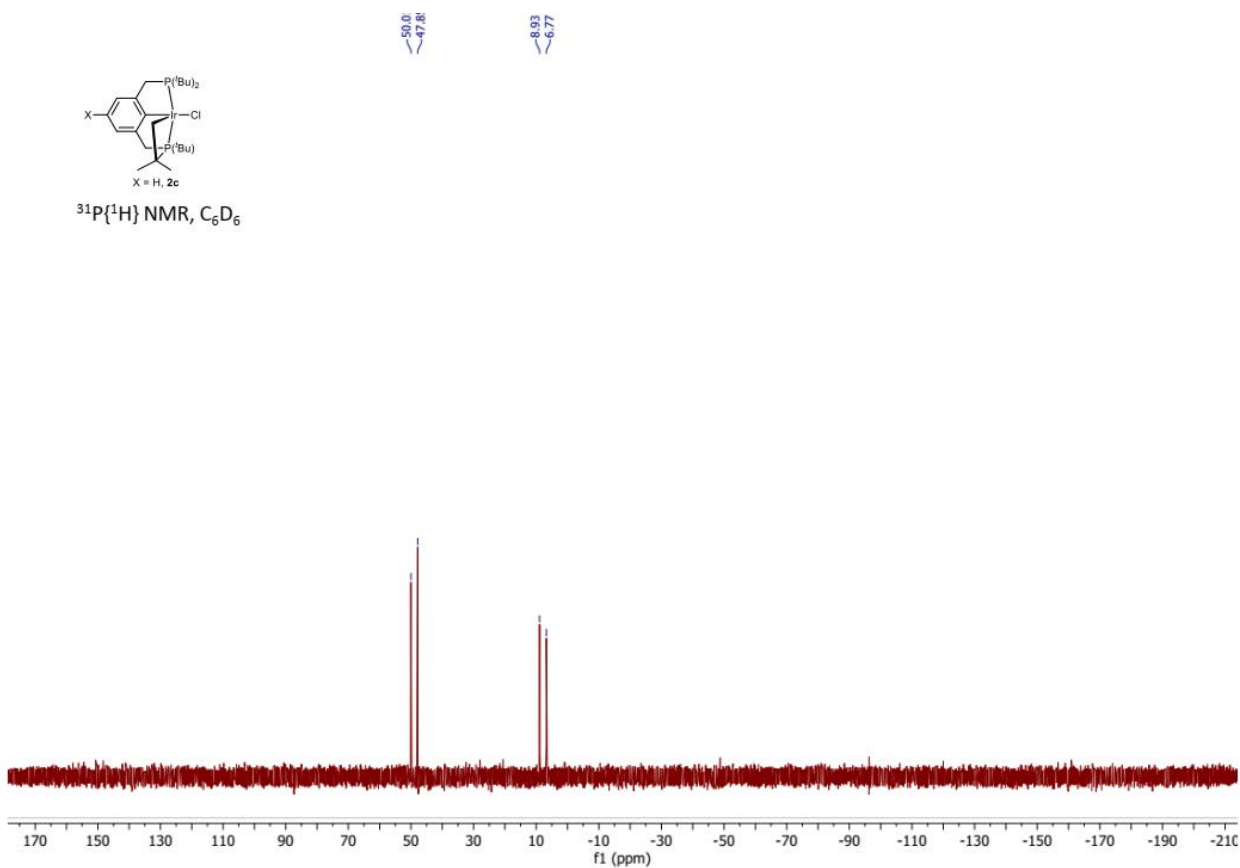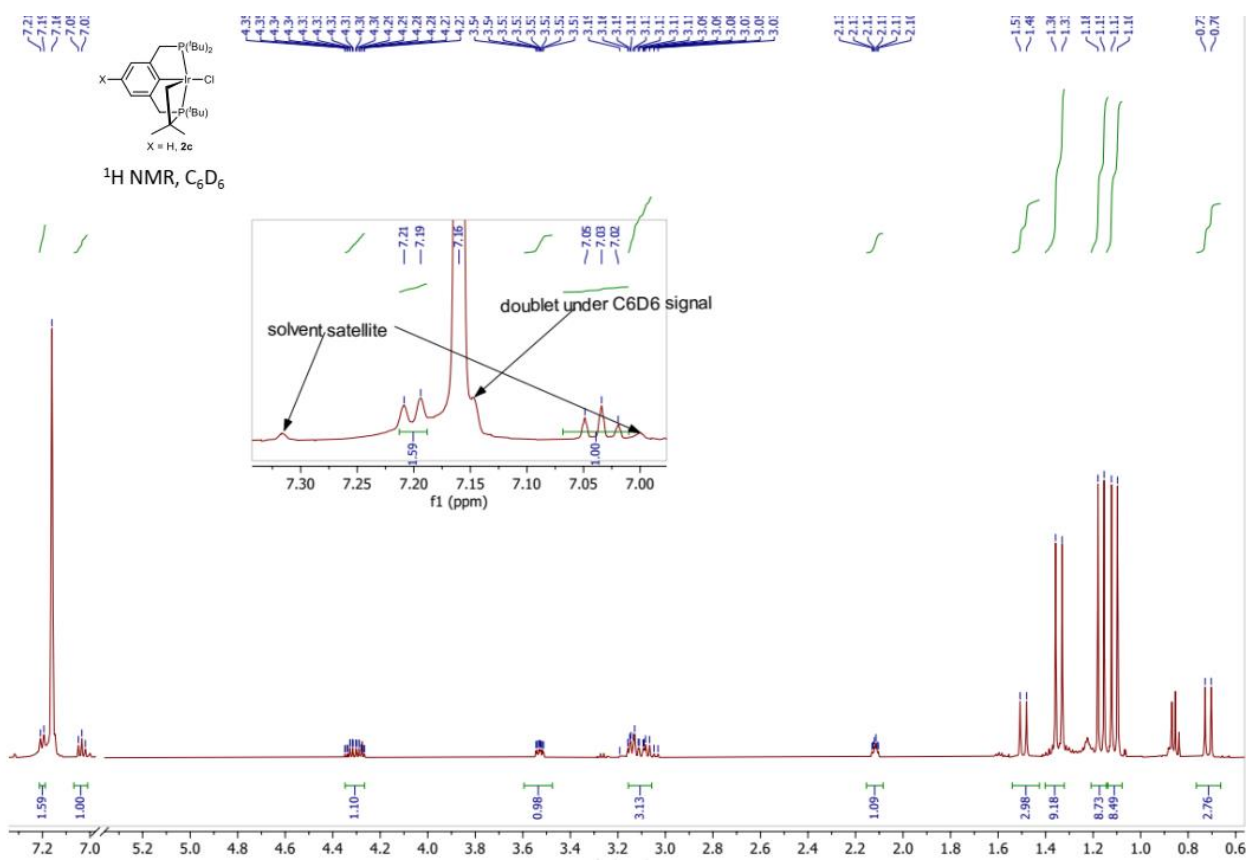





|    |              |              |              |
|----|--------------|--------------|--------------|
| H  | 4.096258000  | -2.709881000 | -2.460755000 |
| H  | 2.525408000  | -1.829838000 | -2.514082000 |
| H  | 4.068194000  | -0.929406000 | -2.629781000 |
| C  | 3.316501000  | 1.631444000  | -1.795125000 |
| H  | 2.491221000  | 1.265870000  | -2.441702000 |
| H  | 3.443737000  | 2.718711000  | -1.981191000 |
| H  | 4.256350000  | 1.130156000  | -2.098127000 |
| C  | 3.102086000  | -3.002728000 | 0.014494000  |
| H  | 3.076362000  | -2.955831000 | 1.120554000  |
| H  | 2.085853000  | -3.251965000 | -0.350527000 |
| H  | 3.781019000  | -3.828682000 | -0.282720000 |
| C  | 5.054381000  | -1.424758000 | -0.111070000 |
| H  | 5.684445000  | -2.308431000 | -0.345925000 |
| H  | 5.511660000  | -0.550305000 | -0.612163000 |
| H  | 5.087343000  | -1.265733000 | 0.984773000  |
| C  | 4.200720000  | 1.781239000  | 0.587465000  |
| H  | 5.127254000  | 1.257907000  | 0.289764000  |
| H  | 4.388470000  | 2.872160000  | 0.498056000  |
| H  | 3.994604000  | 1.553908000  | 1.651121000  |
| C  | 1.786981000  | 2.271794000  | 0.100001000  |
| H  | 0.918629000  | 2.082762000  | -0.565488000 |
| H  | 1.475004000  | 2.088571000  | 1.147726000  |
| H  | 2.049386000  | 3.346181000  | 0.003751000  |
| C  | -2.812694000 | -2.657702000 | -2.202383000 |
| H  | -1.773822000 | -2.457200000 | -2.534445000 |
| H  | -3.088282000 | -3.688056000 | -2.510205000 |
| H  | -3.480580000 | -1.957810000 | -2.738721000 |
| C  | -3.496172000 | 0.707785000  | -1.931122000 |
| H  | -3.893275000 | 1.721069000  | -2.151588000 |
| H  | -2.597166000 | 0.546765000  | -2.562366000 |
| H  | -4.273839000 | -0.024879000 | -2.222065000 |
| C  | -2.153011000 | -3.667252000 | 0.008152000  |
| H  | -1.089427000 | -3.658705000 | -0.303164000 |
| H  | -2.195731000 | -3.594491000 | 1.112218000  |
| H  | -2.586499000 | -4.643402000 | -0.293025000 |
| C  | -4.428209000 | -2.629256000 | -0.241253000 |
| H  | -5.065256000 | -1.904266000 | -0.783091000 |
| H  | -4.810362000 | -3.645444000 | -0.474456000 |
| H  | -4.545965000 | -2.464025000 | 0.847842000  |
| C  | -4.415350000 | 0.701811000  | 0.442980000  |
| H  | -4.878079000 | 1.702339000  | 0.308132000  |
| H  | -5.171666000 | -0.055546000 | 0.168237000  |
| H  | -4.168391000 | 0.578716000  | 1.514993000  |
| C  | -2.196512000 | 1.770433000  | -0.056061000 |
| H  | -1.844500000 | 1.695497000  | 0.992513000  |
| H  | -1.312654000 | 1.792196000  | -0.727674000 |
| H  | -2.723760000 | 2.740608000  | -0.171046000 |
| Cl | 0.122695000  | -0.239396000 | -2.886846000 |

(POCOP)IrHCl<sup>+</sup> (**1a<sup>+</sup>**), E = -2258.90616256362

68

|   |              |              |             |
|---|--------------|--------------|-------------|
| C | -1.117878000 | -1.038409000 | 3.658219000 |
| C | -1.105647000 | -0.960377000 | 2.264361000 |
| C | 0.124903000  | -0.754324000 | 1.533217000 |

|    |              |              |              |
|----|--------------|--------------|--------------|
| C  | 1.344283000  | -0.635180000 | 2.301438000  |
| C  | 1.334908000  | -0.712256000 | 3.695367000  |
| C  | 0.103285000  | -0.912820000 | 4.351777000  |
| H  | -2.064611000 | -1.196437000 | 4.191877000  |
| H  | 2.273732000  | -0.619754000 | 4.257565000  |
| H  | 0.094818000  | -0.973590000 | 5.450473000  |
| O  | 2.516620000  | -0.447625000 | 1.645821000  |
| O  | -2.266440000 | -1.081740000 | 1.573431000  |
| P  | 2.434942000  | -0.332473000 | -0.074732000 |
| P  | -2.168593000 | -0.928765000 | -0.143458000 |
| Ir | 0.136561000  | -0.621019000 | -0.422784000 |
| H  | 0.333221000  | -2.159962000 | -0.436275000 |
| C  | 3.607371000  | -1.705254000 | -0.590128000 |
| C  | 3.041199000  | 1.432051000  | -0.323019000 |
| C  | -2.940876000 | -2.546935000 | -0.700065000 |
| C  | -3.193335000 | 0.628916000  | -0.400972000 |
| C  | 3.472856000  | -1.872007000 | -2.116279000 |
| H  | 4.064523000  | -2.759132000 | -2.422420000 |
| H  | 2.421053000  | -2.037317000 | -2.423285000 |
| H  | 3.862717000  | -0.999303000 | -2.672684000 |
| C  | 3.403237000  | 1.615398000  | -1.807468000 |
| H  | 2.585722000  | 1.281477000  | -2.478555000 |
| H  | 3.575422000  | 2.695585000  | -1.994281000 |
| H  | 4.333045000  | 1.078686000  | -2.077802000 |
| C  | 3.108751000  | -2.979365000 | 0.120491000  |
| H  | 3.177814000  | -2.896485000 | 1.222099000  |
| H  | 2.063514000  | -3.229667000 | -0.152639000 |
| H  | 3.746215000  | -3.827805000 | -0.201733000 |
| C  | 5.059669000  | -1.414865000 | -0.182348000 |
| H  | 5.674233000  | -2.307873000 | -0.419378000 |
| H  | 5.487403000  | -0.560995000 | -0.741153000 |
| H  | 5.153174000  | -1.218885000 | 0.903620000  |
| C  | 4.216930000  | 1.791287000  | 0.598481000  |
| H  | 5.135617000  | 1.229153000  | 0.353234000  |
| H  | 4.438867000  | 2.870728000  | 0.466657000  |
| H  | 3.969723000  | 1.620892000  | 1.663587000  |
| C  | 1.817321000  | 2.303351000  | 0.033677000  |
| H  | 0.971886000  | 2.128490000  | -0.664353000 |
| H  | 1.470261000  | 2.139922000  | 1.074047000  |
| H  | 2.098572000  | 3.372512000  | -0.059410000 |
| C  | -2.729045000 | -2.655945000 | -2.222744000 |
| H  | -1.662070000 | -2.546843000 | -2.500956000 |
| H  | -3.069126000 | -3.660126000 | -2.549539000 |
| H  | -3.312320000 | -1.903693000 | -2.785809000 |
| C  | -3.547024000 | 0.734273000  | -1.894773000 |
| H  | -3.977499000 | 1.739753000  | -2.082036000 |
| H  | -2.653077000 | 0.622684000  | -2.541795000 |
| H  | -4.305329000 | -0.014058000 | -2.195445000 |
| C  | -2.153278000 | -3.661520000 | 0.017125000  |
| H  | -1.071957000 | -3.633518000 | -0.227707000 |
| H  | -2.269634000 | -3.613291000 | 1.116836000  |
| H  | -2.544767000 | -4.639984000 | -0.328384000 |
| C  | -4.429551000 | -2.639390000 | -0.332380000 |
| H  | -5.045016000 | -1.915900000 | -0.899906000 |

|    |              |              |              |
|----|--------------|--------------|--------------|
| H  | -4.790533000 | -3.656415000 | -0.590587000 |
| H  | -4.598828000 | -2.485679000 | 0.751239000  |
| C  | -4.447221000 | 0.667572000  | 0.485904000  |
| H  | -4.931274000 | 1.657495000  | 0.353407000  |
| H  | -5.186333000 | -0.105419000 | 0.209749000  |
| H  | -4.195180000 | 0.551363000  | 1.557146000  |
| C  | -2.239327000 | 1.775789000  | -0.002436000 |
| H  | -1.889284000 | 1.690461000  | 1.046217000  |
| H  | -1.359225000 | 1.829751000  | -0.677075000 |
| H  | -2.778980000 | 2.740620000  | -0.095962000 |
| Cl | 0.099641000  | -0.076871000 | -2.763271000 |

(POCOP)IrCl double cyclometallated (**2a**), E = -2257.88507993071

66

|    |              |              |              |
|----|--------------|--------------|--------------|
| C  | -1.027024000 | -0.863887000 | 3.695642000  |
| C  | -1.002892000 | -0.684301000 | 2.301565000  |
| C  | 0.207763000  | -0.561633000 | 1.575872000  |
| C  | 1.413469000  | -0.677856000 | 2.310030000  |
| C  | 1.424257000  | -0.848355000 | 3.705218000  |
| C  | 0.196091000  | -0.935752000 | 4.386570000  |
| H  | -1.989485000 | -0.951009000 | 4.220075000  |
| H  | 2.382792000  | -0.918882000 | 4.239380000  |
| H  | 0.192853000  | -1.070766000 | 5.478893000  |
| O  | 2.620169000  | -0.628850000 | 1.633259000  |
| O  | -2.202481000 | -0.638063000 | 1.609534000  |
| P  | 2.498786000  | -0.430609000 | -0.063537000 |
| P  | -2.037069000 | -0.533702000 | -0.089337000 |
| Ir | 0.206647000  | -0.342090000 | -0.424657000 |
| C  | 3.659750000  | -1.779346000 | -0.669819000 |
| C  | 3.159178000  | 1.330642000  | -0.261153000 |
| C  | -1.927184000 | -2.331601000 | -0.664626000 |
| C  | -3.570750000 | 0.455585000  | -0.497818000 |
| C  | 3.526499000  | -1.846375000 | -2.203655000 |
| H  | 4.011645000  | -2.776541000 | -2.566339000 |
| H  | 2.465043000  | -1.852807000 | -2.525247000 |
| H  | 4.022287000  | -0.992222000 | -2.701799000 |
| C  | 3.509263000  | 1.574450000  | -1.738365000 |
| H  | 2.680858000  | 1.266172000  | -2.410061000 |
| H  | 3.689532000  | 2.659783000  | -1.889363000 |
| H  | 4.432324000  | 1.040075000  | -2.036732000 |
| C  | 3.130477000  | -3.085860000 | -0.045117000 |
| H  | 3.171449000  | -3.056537000 | 1.060825000  |
| H  | 2.089268000  | -3.296178000 | -0.353520000 |
| H  | 3.764654000  | -3.927000000 | -0.394607000 |
| C  | 5.116241000  | -1.551535000 | -0.240585000 |
| H  | 5.719255000  | -2.437031000 | -0.533275000 |
| H  | 5.563181000  | -0.667762000 | -0.735032000 |
| H  | 5.204846000  | -1.429038000 | 0.856967000  |
| C  | 4.338966000  | 1.655420000  | 0.664741000  |
| H  | 5.261246000  | 1.119791000  | 0.374064000  |
| H  | 4.550639000  | 2.744181000  | 0.605073000  |
| H  | 4.105873000  | 1.406982000  | 1.718104000  |
| C  | 1.941826000  | 2.200046000  | 0.133837000  |

|    |              |              |              |
|----|--------------|--------------|--------------|
| H  | 1.05455000   | 1.989491000  | -0.514279000 |
| H  | 1.649723000  | 2.056094000  | 1.192438000  |
| H  | 2.187958000  | 3.273047000  | -0.013117000 |
| C  | -2.411421000 | -2.493858000 | -2.111333000 |
| H  | -1.930662000 | -1.755342000 | -2.784359000 |
| H  | -2.132830000 | -3.508243000 | -2.466567000 |
| H  | -3.512522000 | -2.401225000 | -2.191656000 |
| C  | -3.579883000 | 0.706387000  | -2.017245000 |
| H  | -4.343629000 | 1.478517000  | -2.246011000 |
| H  | -2.596003000 | 1.068253000  | -2.380196000 |
| H  | -3.840289000 | -0.204296000 | -2.587605000 |
| C  | -0.371170000 | -2.341367000 | -0.596344000 |
| H  | -0.004812000 | -2.911942000 | 0.279177000  |
| H  | 0.092304000  | -2.721565000 | -1.528680000 |
| C  | -2.587660000 | -3.341115000 | 0.277070000  |
| H  | -3.692715000 | -3.260186000 | 0.243621000  |
| H  | -2.311844000 | -4.370217000 | -0.036169000 |
| H  | -2.260360000 | -3.201628000 | 1.325598000  |
| C  | -4.831499000 | -0.287343000 | -0.029776000 |
| H  | -5.722385000 | 0.346195000  | -0.225797000 |
| H  | -4.971605000 | -1.242437000 | -0.573805000 |
| H  | -4.795430000 | -0.501494000 | 1.056314000  |
| C  | -3.405285000 | 1.792275000  | 0.251916000  |
| H  | -3.365073000 | 1.644024000  | 1.348155000  |
| H  | -2.484025000 | 2.321691000  | -0.066285000 |
| H  | -4.272911000 | 2.444144000  | 0.018433000  |
| Cl | 0.231284000  | 0.100121000  | -2.862686000 |

(POCOP)IrCl<sup>+</sup> double cyclometallated (**2a<sup>+</sup>**), E = -2257.69159710438

66

|    |              |              |              |
|----|--------------|--------------|--------------|
| C  | -1.044978000 | -0.837904000 | 3.671210000  |
| C  | -1.028060000 | -0.691636000 | 2.282417000  |
| C  | 0.205195000  | -0.576729000 | 1.549076000  |
| C  | 1.431306000  | -0.655152000 | 2.300858000  |
| C  | 1.424647000  | -0.791525000 | 3.692334000  |
| C  | 0.185935000  | -0.875849000 | 4.357246000  |
| H  | -2.001078000 | -0.925529000 | 4.204527000  |
| H  | 2.373838000  | -0.844926000 | 4.242382000  |
| H  | 0.178821000  | -0.985957000 | 5.452025000  |
| O  | 2.618489000  | -0.626290000 | 1.637287000  |
| O  | -2.204791000 | -0.660506000 | 1.593303000  |
| P  | 2.538638000  | -0.429204000 | -0.070070000 |
| P  | -2.070261000 | -0.567351000 | -0.112363000 |
| Ir | 0.205531000  | -0.386965000 | -0.411501000 |
| C  | 3.679218000  | -1.789827000 | -0.665724000 |
| C  | 3.176384000  | 1.339051000  | -0.241682000 |
| C  | -1.953570000 | -2.365319000 | -0.681419000 |
| C  | -3.579990000 | 0.453899000  | -0.511993000 |
| C  | 3.503074000  | -1.880951000 | -2.194622000 |
| H  | 4.063213000  | -2.766749000 | -2.558206000 |
| H  | 2.440200000  | -2.005408000 | -2.483047000 |
| H  | 3.900982000  | -0.992323000 | -2.719188000 |
| C  | 3.533394000  | 1.591760000  | -1.716311000 |
| H  | 2.703613000  | 1.318295000  | -2.399247000 |

|    |              |              |              |
|----|--------------|--------------|--------------|
| H  | 3.734799000  | 2.675528000  | -1.844424000 |
| H  | 4.447251000  | 1.045588000  | -2.019978000 |
| C  | 3.171628000  | -3.084377000 | -0.000098000 |
| H  | 3.264154000  | -3.046237000 | 1.102127000  |
| H  | 2.119215000  | -3.302850000 | -0.262770000 |
| H  | 3.789071000  | -3.928668000 | -0.369204000 |
| C  | 5.144847000  | -1.538918000 | -0.281723000 |
| H  | 5.740028000  | -2.427647000 | -0.577592000 |
| H  | 5.571450000  | -0.663740000 | -0.807425000 |
| H  | 5.267613000  | -1.398530000 | 0.809984000  |
| C  | 4.361342000  | 1.639305000  | 0.687420000  |
| H  | 5.274914000  | 1.089246000  | 0.398724000  |
| H  | 4.586469000  | 2.724036000  | 0.617546000  |
| H  | 4.125008000  | 1.406174000  | 1.743118000  |
| C  | 1.965155000  | 2.207239000  | 0.168270000  |
| H  | 1.080444000  | 2.031518000  | -0.489375000 |
| H  | 1.669034000  | 2.050773000  | 1.224267000  |
| H  | 2.229935000  | 3.278337000  | 0.048527000  |
| C  | -2.474409000 | -2.523379000 | -2.116562000 |
| H  | -2.022083000 | -1.783261000 | -2.806323000 |
| H  | -2.197198000 | -3.535451000 | -2.476630000 |
| H  | -3.577122000 | -2.438890000 | -2.164056000 |
| C  | -3.592026000 | 0.719583000  | -2.028227000 |
| H  | -4.387144000 | 1.463786000  | -2.239084000 |
| H  | -2.627761000 | 1.134536000  | -2.383966000 |
| H  | -3.819658000 | -0.189941000 | -2.613509000 |
| C  | -0.402165000 | -2.382558000 | -0.653000000 |
| H  | 0.005892000  | -2.980768000 | 0.181558000  |
| H  | 0.056778000  | -2.685628000 | -1.614554000 |
| C  | -2.590410000 | -3.370327000 | 0.281091000  |
| H  | -3.693468000 | -3.270111000 | 0.290225000  |
| H  | -2.342278000 | -4.397657000 | -0.056724000 |
| H  | -2.217991000 | -3.251182000 | 1.316707000  |
| C  | -4.841000000 | -0.290712000 | -0.044874000 |
| H  | -5.721323000 | 0.359004000  | -0.231275000 |
| H  | -4.995425000 | -1.234700000 | -0.603391000 |
| H  | -4.806804000 | -0.516769000 | 1.038574000  |
| C  | -3.390044000 | 1.776862000  | 0.256234000  |
| H  | -3.360978000 | 1.619637000  | 1.351323000  |
| H  | -2.463336000 | 2.300126000  | -0.055272000 |
| H  | -4.249414000 | 2.438932000  | 0.024153000  |
| Cl | 0.179303000  | 0.250708000  | -2.731287000 |

(POCOP)IrCl<sup>+</sup> (ii), E = -2258.28756808506

67

|   |              |              |             |
|---|--------------|--------------|-------------|
| C | -1.113736000 | -1.086102000 | 3.630252000 |
| C | -1.129877000 | -0.864440000 | 2.253229000 |
| C | 0.109479000  | -0.629846000 | 1.512486000 |
| C | 1.346096000  | -0.548085000 | 2.289624000 |
| C | 1.346446000  | -0.771696000 | 3.666413000 |
| C | 0.119297000  | -1.028141000 | 4.310178000 |
| H | -2.049970000 | -1.301831000 | 4.161967000 |
| H | 2.291181000  | -0.746898000 | 4.225568000 |
| H | 0.124944000  | -1.197054000 | 5.397910000 |

|    |              |              |              |
|----|--------------|--------------|--------------|
| O  | 2.499476000  | -0.286271000 | 1.655163000  |
| O  | -2.293270000 | -0.898263000 | 1.584902000  |
| P  | 2.416609000  | -0.213068000 | -0.080145000 |
| P  | -2.180827000 | -0.804108000 | -0.147578000 |
| Ir | 0.117846000  | -0.475272000 | -0.398054000 |
| C  | 3.438215000  | -1.716842000 | -0.571727000 |
| C  | 3.231795000  | 1.464034000  | -0.341869000 |
| C  | -2.773110000 | -2.517221000 | -0.659526000 |
| C  | -3.386469000 | 0.611477000  | -0.443569000 |
| C  | 3.200759000  | -1.903474000 | -2.084294000 |
| H  | 3.697483000  | -2.843391000 | -2.402344000 |
| H  | 2.120579000  | -1.995281000 | -2.320725000 |
| H  | 3.622084000  | -1.077440000 | -2.687773000 |
| C  | 3.583472000  | 1.603714000  | -1.833857000 |
| H  | 2.708135000  | 1.411700000  | -2.485913000 |
| H  | 3.918052000  | 2.645814000  | -2.016962000 |
| H  | 4.412137000  | 0.932089000  | -2.131238000 |
| C  | 2.830234000  | -2.909074000 | 0.194396000  |
| H  | 2.982623000  | -2.822616000 | 1.287640000  |
| H  | 1.744949000  | -3.018631000 | -0.007422000 |
| H  | 3.334343000  | -3.835962000 | -0.147901000 |
| C  | 4.932043000  | -1.588159000 | -0.249213000 |
| H  | 5.426150000  | -2.552269000 | -0.490549000 |
| H  | 5.425657000  | -0.803415000 | -0.853299000 |
| H  | 5.106081000  | -1.380228000 | 0.824465000  |
| C  | 4.473367000  | 1.653251000  | 0.546356000  |
| H  | 5.304898000  | 0.982002000  | 0.268665000  |
| H  | 4.827561000  | 2.696848000  | 0.415421000  |
| H  | 4.238668000  | 1.506412000  | 1.617726000  |
| C  | 2.155585000  | 2.496425000  | 0.056153000  |
| H  | 1.265738000  | 2.438724000  | -0.598463000 |
| H  | 1.830660000  | 2.369912000  | 1.108546000  |
| H  | 2.593556000  | 3.511299000  | -0.039958000 |
| C  | -2.442970000 | -2.637655000 | -2.161365000 |
| H  | -1.365408000 | -2.461115000 | -2.358350000 |
| H  | -2.682042000 | -3.670263000 | -2.489899000 |
| H  | -3.031898000 | -1.939522000 | -2.785787000 |
| C  | -3.718236000 | 0.658290000  | -1.945976000 |
| H  | -4.300274000 | 1.581701000  | -2.145805000 |
| H  | -2.804028000 | 0.694557000  | -2.571408000 |
| H  | -4.340609000 | -0.201009000 | -2.262868000 |
| C  | -1.912495000 | -3.518447000 | 0.137207000  |
| H  | -0.827995000 | -3.350905000 | -0.025121000 |
| H  | -2.121274000 | -3.474473000 | 1.223643000  |
| H  | -2.154079000 | -4.541986000 | -0.215505000 |
| C  | -4.261718000 | -2.768504000 | -0.389256000 |
| H  | -4.915412000 | -2.132569000 | -1.015990000 |
| H  | -4.489178000 | -3.825638000 | -0.639520000 |
| H  | -4.519686000 | -2.611450000 | 0.676116000  |
| C  | -4.660442000 | 0.479845000  | 0.408387000  |
| H  | -5.264238000 | 1.398919000  | 0.258741000  |
| H  | -5.285861000 | -0.381300000 | 0.114519000  |
| H  | -4.426696000 | 0.399204000  | 1.486975000  |
| C  | -2.619019000 | 1.883081000  | -0.022986000 |

|    |              |             |              |
|----|--------------|-------------|--------------|
| H  | -2.301615000 | 1.842438000 | 1.038493000  |
| H  | -1.726182000 | 2.053512000 | -0.653351000 |
| H  | -3.297583000 | 2.753422000 | -0.137278000 |
| Cl | -0.003494000 | 0.699170000 | -2.424437000 |

**1a-TS1**, E = -2258.25968803897

67

|    |              |              |              |
|----|--------------|--------------|--------------|
| C  | -1.134233000 | -0.838701000 | 3.669580000  |
| C  | -1.095405000 | -0.784064000 | 2.275881000  |
| C  | 0.142174000  | -0.599115000 | 1.555184000  |
| C  | 1.355653000  | -0.548097000 | 2.332816000  |
| C  | 1.323749000  | -0.589452000 | 3.731140000  |
| C  | 0.080865000  | -0.730187000 | 4.376573000  |
| H  | -2.090543000 | -0.974571000 | 4.192019000  |
| H  | 2.259247000  | -0.521987000 | 4.302700000  |
| H  | 0.057109000  | -0.764977000 | 5.476203000  |
| O  | 2.550078000  | -0.451540000 | 1.695717000  |
| O  | -2.249462000 | -0.954178000 | 1.562089000  |
| P  | 2.495346000  | -0.294956000 | -0.022282000 |
| P  | -2.082911000 | -0.753623000 | -0.127819000 |
| Ir | 0.164172000  | -0.398285000 | -0.405040000 |
| C  | 3.538967000  | -1.765296000 | -0.560165000 |
| C  | 3.295966000  | 1.402905000  | -0.209494000 |
| C  | -2.014711000 | -2.484534000 | -0.905438000 |
| C  | -3.509410000 | 0.390642000  | -0.503132000 |
| C  | 3.383346000  | -1.896201000 | -2.087627000 |
| H  | 3.899378000  | -2.821929000 | -2.415161000 |
| H  | 2.321723000  | -1.970260000 | -2.396876000 |
| H  | 3.836114000  | -1.046554000 | -2.632077000 |
| C  | 3.704116000  | 1.586888000  | -1.681699000 |
| H  | 2.858556000  | 1.386242000  | -2.370119000 |
| H  | 4.016768000  | 2.642151000  | -1.825773000 |
| H  | 4.563399000  | 0.946035000  | -1.959400000 |
| C  | 2.928831000  | -2.993974000 | 0.143761000  |
| H  | 3.056421000  | -2.943987000 | 1.241845000  |
| H  | 1.848805000  | -3.117425000 | -0.072629000 |
| H  | 3.447952000  | -3.902234000 | -0.224291000 |
| C  | 5.015758000  | -1.624936000 | -0.163436000 |
| H  | 5.537814000  | -2.570477000 | -0.418346000 |
| H  | 5.521094000  | -0.808957000 | -0.713820000 |
| H  | 5.136373000  | -1.455535000 | 0.924201000  |
| C  | 4.491338000  | 1.597518000  | 0.736673000  |
| H  | 5.346775000  | 0.945933000  | 0.484451000  |
| H  | 4.832603000  | 2.649458000  | 0.641569000  |
| H  | 4.211083000  | 1.423837000  | 1.792864000  |
| C  | 2.176795000  | 2.401198000  | 0.160324000  |
| H  | 1.321650000  | 2.329763000  | -0.542744000 |
| H  | 1.811148000  | 2.250492000  | 1.196199000  |
| H  | 2.585023000  | 3.431244000  | 0.097050000  |
| C  | -3.165003000 | -2.917925000 | -1.819589000 |
| H  | -3.355818000 | -2.198496000 | -2.637097000 |
| H  | -2.905991000 | -3.892587000 | -2.281598000 |
| H  | -4.096187000 | -3.059654000 | -1.238166000 |
| C  | -3.495288000 | 0.654335000  | -2.019070000 |
| H  | -4.219342000 | 1.466819000  | -2.234243000 |



|    |              |              |              |
|----|--------------|--------------|--------------|
| H  | -2.495579000 | 0.980300000  | -2.373287000 |
| H  | -3.809125000 | -0.231172000 | -2.603189000 |
| C  | -0.729989000 | -2.244904000 | -1.719313000 |
| H  | 0.300494000  | -1.973123000 | -1.019537000 |
| H  | -0.186090000 | -3.192854000 | -1.950027000 |
| H  | -0.837126000 | -1.654289000 | -2.645584000 |
| C  | -1.783252000 | -3.512860000 | 0.212284000  |
| H  | -2.675637000 | -3.607091000 | 0.859074000  |
| H  | -1.584852000 | -4.499217000 | -0.254538000 |
| H  | -0.914989000 | -3.256872000 | 0.851809000  |
| C  | -4.831163000 | -0.225604000 | -0.021725000 |
| H  | -5.643301000 | 0.510258000  | -0.198194000 |
| H  | -5.088092000 | -1.148176000 | -0.576036000 |
| H  | -4.805735000 | -0.451895000 | 1.061807000  |
| C  | -3.182569000 | 1.686262000  | 0.266038000  |
| H  | -3.149641000 | 1.522183000  | 1.360527000  |
| H  | -2.218154000 | 2.123777000  | -0.062180000 |
| H  | -3.981440000 | 2.426163000  | 0.054241000  |
| Cl | 0.245685000  | 0.686378000  | -2.622719000 |

iii, E = -2258.28613428535

67

|    |              |              |              |
|----|--------------|--------------|--------------|
| C  | -1.043015000 | -0.618663000 | 3.685326000  |
| C  | -1.015773000 | -0.798852000 | 2.299912000  |
| C  | 0.232336000  | -0.799461000 | 1.609170000  |
| C  | 1.456745000  | -0.619157000 | 2.318630000  |
| C  | 1.429743000  | -0.434720000 | 3.706269000  |
| C  | 0.182501000  | -0.441445000 | 4.360886000  |
| H  | -2.000369000 | -0.605824000 | 4.223390000  |
| H  | 2.366159000  | -0.284358000 | 4.260215000  |
| H  | 0.162309000  | -0.291559000 | 5.450772000  |
| O  | 2.627153000  | -0.652863000 | 1.622458000  |
| O  | -2.159772000 | -0.974230000 | 1.572250000  |
| P  | 2.566399000  | -0.487183000 | -0.101953000 |
| P  | -2.047098000 | -0.745782000 | -0.134076000 |
| Ir | 0.205516000  | -0.572160000 | -0.486370000 |
| C  | 3.763066000  | -1.819726000 | -0.639250000 |
| C  | 3.129569000  | 1.302587000  | -0.268654000 |
| C  | -2.033150000 | -2.470760000 | -0.898256000 |
| C  | -3.481836000 | 0.421708000  | -0.402383000 |
| C  | 3.656586000  | -1.907411000 | -2.174567000 |
| H  | 4.232576000  | -2.791557000 | -2.516697000 |
| H  | 2.606361000  | -2.031627000 | -2.507910000 |
| H  | 4.076766000  | -1.016469000 | -2.677665000 |
| C  | 3.466820000  | 1.572110000  | -1.745071000 |
| H  | 2.647654000  | 1.258771000  | -2.423647000 |
| H  | 3.615730000  | 2.664154000  | -1.875640000 |
| H  | 4.404791000  | 1.069632000  | -2.050943000 |
| C  | 3.232788000  | -3.120137000 | -0.002699000 |
| H  | 3.275145000  | -3.086698000 | 1.102890000  |
| H  | 2.192536000  | -3.339516000 | -0.315255000 |
| H  | 3.867241000  | -3.962093000 | -0.347436000 |
| C  | 5.203852000  | -1.549258000 | -0.183972000 |
| H  | 5.826624000  | -2.430036000 | -0.444797000 |

|    |              |              |              |
|----|--------------|--------------|--------------|
| H  | 5.642561000  | -0.669730000 | -0.692523000 |
| H  | 5.269071000  | -1.400435000 | 0.911553000  |
| C  | 4.305862000  | 1.654095000  | 0.652742000  |
| H  | 5.241923000  | 1.150458000  | 0.350621000  |
| H  | 4.478824000  | 2.748848000  | 0.590594000  |
| H  | 4.091595000  | 1.401754000  | 1.708711000  |
| C  | 1.879213000  | 2.110446000  | 0.151065000  |
| H  | 0.998760000  | 1.884401000  | -0.496319000 |
| H  | 1.604238000  | 1.945377000  | 1.211632000  |
| H  | 2.086678000  | 3.193506000  | 0.024938000  |
| C  | -2.770977000 | -2.521820000 | -2.242848000 |
| H  | -2.411213000 | -1.741828000 | -2.941946000 |
| H  | -2.574665000 | -3.508673000 | -2.709666000 |
| H  | -3.865863000 | -2.419695000 | -2.113835000 |
| C  | -3.525583000 | 0.799492000  | -1.893187000 |
| H  | -4.244691000 | 1.635629000  | -2.013421000 |
| H  | -2.537080000 | 1.138584000  | -2.263400000 |
| H  | -3.873096000 | -0.035462000 | -2.528203000 |
| C  | -0.491152000 | -2.474859000 | -1.116077000 |
| H  | 0.355087000  | -1.728546000 | 0.863923000  |
| H  | 0.024473000  | -3.261358000 | -0.532034000 |
| H  | -0.202480000 | -2.530515000 | -2.181937000 |
| C  | -2.512876000 | -3.559424000 | 0.065223000  |
| H  | -3.599346000 | -3.468400000 | 0.261716000  |
| H  | -2.327799000 | -4.551985000 | -0.394517000 |
| H  | -1.978479000 | -3.524155000 | 1.034406000  |
| C  | -4.781009000 | -0.250809000 | 0.068561000  |
| H  | -5.613525000 | 0.474545000  | -0.044901000 |
| H  | -5.029175000 | -1.144690000 | -0.536710000 |
| H  | -4.726361000 | -0.544025000 | 1.134795000  |
| C  | -3.150523000 | 1.663615000  | 0.449021000  |
| H  | -3.096586000 | 1.426033000  | 1.528731000  |
| H  | -2.195200000 | 2.130923000  | 0.135130000  |
| H  | -3.958490000 | 2.409541000  | 0.302498000  |
| Cl | 0.159507000  | 0.206995000  | -2.731858000 |

**1a-TS2**, E = -2258.28288977988

67

|    |              |              |              |
|----|--------------|--------------|--------------|
| C  | -1.005436000 | -0.526760000 | 3.678938000  |
| C  | -0.996211000 | -0.778089000 | 2.307204000  |
| C  | 0.258441000  | -0.897211000 | 1.598747000  |
| C  | 1.498006000  | -0.676909000 | 2.309422000  |
| C  | 1.481712000  | -0.423888000 | 3.683198000  |
| C  | 0.233418000  | -0.360964000 | 4.335647000  |
| H  | -1.955098000 | -0.437076000 | 4.223017000  |
| H  | 2.420192000  | -0.260186000 | 4.229439000  |
| H  | 0.222935000  | -0.148101000 | 5.415549000  |
| O  | 2.650304000  | -0.747555000 | 1.610048000  |
| O  | -2.139915000 | -0.916172000 | 1.597060000  |
| P  | 2.559291000  | -0.546707000 | -0.124907000 |
| P  | -2.022303000 | -0.704324000 | -0.131003000 |
| Ir | 0.224528000  | -0.558958000 | -0.486656000 |
| C  | 3.787533000  | -1.837263000 | -0.684203000 |
| C  | 3.074737000  | 1.261583000  | -0.244926000 |

|    |              |              |              |
|----|--------------|--------------|--------------|
| C  | -2.014358000 | -2.446230000 | -0.848481000 |
| C  | -3.478732000 | 0.434130000  | -0.398485000 |
| C  | 3.733815000  | -1.852388000 | -2.225115000 |
| H  | 4.291306000  | -2.740504000 | -2.587060000 |
| H  | 2.692940000  | -1.922023000 | -2.601896000 |
| H  | 4.203471000  | -0.955449000 | -2.670081000 |
| C  | 3.392720000  | 1.575445000  | -1.717085000 |
| H  | 2.586000000  | 1.237196000  | -2.399223000 |
| H  | 3.491904000  | 2.675383000  | -1.826876000 |
| H  | 4.351183000  | 1.121115000  | -2.033915000 |
| C  | 3.240425000  | -3.169069000 | -0.131349000 |
| H  | 3.226737000  | -3.184647000 | 0.975809000  |
| H  | 2.219683000  | -3.378975000 | -0.507501000 |
| H  | 3.900068000  | -3.990445000 | -0.478633000 |
| C  | 5.208226000  | -1.577008000 | -0.165039000 |
| H  | 5.849959000  | -2.438194000 | -0.444740000 |
| H  | 5.654457000  | -0.669951000 | -0.615642000 |
| H  | 5.232771000  | -1.479033000 | 0.937859000  |
| C  | 4.239991000  | 1.641072000  | 0.677188000  |
| H  | 5.191437000  | 1.176659000  | 0.359447000  |
| H  | 4.374115000  | 2.742314000  | 0.635725000  |
| H  | 4.043442000  | 1.360435000  | 1.729493000  |
| C  | 1.791604000  | 2.007873000  | 0.193745000  |
| H  | 0.901302000  | 1.726903000  | -0.429211000 |
| H  | 1.550107000  | 1.851245000  | 1.263236000  |
| H  | 1.926114000  | 3.098453000  | 0.036770000  |
| C  | -2.668783000 | -2.488364000 | -2.236500000 |
| H  | -2.246995000 | -1.719706000 | -2.913773000 |
| H  | -2.465724000 | -3.482121000 | -2.685779000 |
| H  | -3.767185000 | -2.361715000 | -2.176616000 |
| C  | -3.511452000 | 0.803950000  | -1.892940000 |
| H  | -4.234169000 | 1.634977000  | -2.026443000 |
| H  | -2.521035000 | 1.144920000  | -2.257051000 |
| H  | -3.845967000 | -0.037909000 | -2.525979000 |
| C  | -0.458776000 | -2.494092000 | -0.971437000 |
| H  | 0.332758000  | -1.916769000 | 1.111917000  |
| H  | -0.010732000 | -3.249838000 | -0.294373000 |
| H  | -0.112341000 | -2.671465000 | -2.007094000 |
| C  | -2.587650000 | -3.510051000 | 0.090516000  |
| H  | -3.682919000 | -3.391392000 | 0.208349000  |
| H  | -2.395337000 | -4.513845000 | -0.341359000 |
| H  | -2.123220000 | -3.473743000 | 1.095235000  |
| C  | -4.772897000 | -0.255418000 | 0.059999000  |
| H  | -5.616600000 | 0.454944000  | -0.065406000 |
| H  | -4.999015000 | -1.155957000 | -0.544256000 |
| H  | -4.725632000 | -0.544011000 | 1.127989000  |
| C  | -3.176846000 | 1.686428000  | 0.448255000  |
| H  | -3.134806000 | 1.456723000  | 1.530251000  |
| H  | -2.222507000 | 2.163273000  | 0.145348000  |
| H  | -3.991363000 | 2.421838000  | 0.285258000  |
| Cl | 0.190201000  | 0.085891000  | -2.797355000 |

iv, E = -2258.28381068069

67

|    |              |              |              |
|----|--------------|--------------|--------------|
| C  | -1.001324000 | -0.672839000 | 3.667025000  |
| C  | -1.011551000 | -0.870337000 | 2.287883000  |
| C  | 0.244156000  | -1.066622000 | 1.540195000  |
| C  | 1.499741000  | -0.837402000 | 2.278528000  |
| C  | 1.492305000  | -0.637455000 | 3.658816000  |
| C  | 0.247041000  | -0.568929000 | 4.316708000  |
| H  | -1.942165000 | -0.561014000 | 4.222253000  |
| H  | 2.433820000  | -0.500067000 | 4.207090000  |
| O  | 2.639849000  | -0.873843000 | 1.584905000  |
| O  | -2.155621000 | -0.920267000 | 1.597667000  |
| P  | 2.523622000  | -0.587839000 | -0.152181000 |
| P  | -2.027069000 | -0.675618000 | -0.144199000 |
| Ir | 0.214664000  | -0.516467000 | -0.475487000 |
| C  | 3.734543000  | -1.862669000 | -0.782108000 |
| C  | 3.075302000  | 1.215202000  | -0.172367000 |
| C  | -1.995572000 | -2.409726000 | -0.877720000 |
| C  | -3.514705000 | 0.428079000  | -0.380109000 |
| C  | 3.658419000  | -1.806346000 | -2.321651000 |
| H  | 4.196286000  | -2.685530000 | -2.731969000 |
| H  | 2.611590000  | -1.839457000 | -2.686660000 |
| H  | 4.136814000  | -0.897117000 | -2.731060000 |
| C  | 3.394660000  | 1.596949000  | -1.628536000 |
| H  | 2.581839000  | 1.301701000  | -2.323828000 |
| H  | 3.507716000  | 2.699609000  | -1.684839000 |
| H  | 4.346765000  | 1.146542000  | -1.969373000 |
| C  | 3.188060000  | -3.215473000 | -0.282332000 |
| H  | 3.192001000  | -3.281711000 | 0.823203000  |
| H  | 2.160626000  | -3.403236000 | -0.650199000 |
| H  | 3.838632000  | -4.023026000 | -0.676171000 |
| C  | 5.164871000  | -1.635439000 | -0.274280000 |
| H  | 5.796667000  | -2.485104000 | -0.606990000 |
| H  | 5.609346000  | -0.709641000 | -0.686826000 |
| H  | 5.208813000  | -1.592634000 | 0.831569000  |
| C  | 4.246279000  | 1.534585000  | 0.764661000  |
| H  | 5.190566000  | 1.071344000  | 0.424836000  |
| H  | 4.396851000  | 2.634509000  | 0.773648000  |
| H  | 4.046960000  | 1.209479000  | 1.803588000  |
| C  | 1.801461000  | 1.954974000  | 0.303317000  |
| H  | 0.905549000  | 1.715337000  | -0.331761000 |
| H  | 1.561267000  | 1.754145000  | 1.365788000  |
| H  | 1.945810000  | 3.050326000  | 0.195202000  |
| C  | -2.605543000 | -2.426872000 | -2.286584000 |
| H  | -2.164938000 | -1.641946000 | -2.932989000 |
| H  | -2.381894000 | -3.410282000 | -2.749050000 |
| H  | -3.706181000 | -2.307542000 | -2.261029000 |
| C  | -3.546987000 | 0.829083000  | -1.867611000 |
| H  | -4.282628000 | 1.650722000  | -1.988279000 |
| H  | -2.560235000 | 1.192622000  | -2.220279000 |
| H  | -3.863892000 | -0.005570000 | -2.519137000 |
| C  | -0.434825000 | -2.448197000 | -0.951849000 |
| H  | 0.273953000  | -2.185315000 | 1.399437000  |
| H  | -0.011039000 | -3.193979000 | -0.248483000 |
| H  | -0.062196000 | -2.649916000 | -1.974689000 |
| C  | -2.598522000 | -3.491590000 | 0.021131000  |

|    |              |              |              |
|----|--------------|--------------|--------------|
| H  | -3.698095000 | -3.380825000 | 0.100989000  |
| H  | -2.385576000 | -4.487130000 | -0.420410000 |
| H  | -2.171721000 | -3.473054000 | 1.043044000  |
| C  | -4.795147000 | -0.301665000 | 0.052834000  |
| H  | -5.655340000 | 0.390545000  | -0.061818000 |
| H  | -4.995122000 | -1.192844000 | -0.574080000 |
| H  | -4.748588000 | -0.614741000 | 1.113997000  |
| C  | -3.249483000 | 1.670120000  | 0.493390000  |
| H  | -3.208356000 | 1.419603000  | 1.570842000  |
| H  | -2.304497000 | 2.174890000  | 0.206654000  |
| H  | -4.079992000 | 2.389591000  | 0.339710000  |
| Cl | 0.192213000  | 0.183544000  | -2.801145000 |
| H  | 0.248299000  | -0.388752000 | 5.403087000  |

i, E = -2258.47246674245

67

|    |              |              |              |
|----|--------------|--------------|--------------|
| C  | -1.013293000 | -1.125455000 | 3.561823000  |
| C  | -0.948760000 | -1.010017000 | 2.165342000  |
| C  | 0.284834000  | -0.739251000 | 1.481074000  |
| C  | 1.456648000  | -0.584059000 | 2.297410000  |
| C  | 1.408580000  | -0.697428000 | 3.694364000  |
| C  | 0.170229000  | -0.967555000 | 4.307792000  |
| H  | -1.974651000 | -1.334340000 | 4.051552000  |
| H  | 2.325812000  | -0.574065000 | 4.287051000  |
| H  | 0.126150000  | -1.057347000 | 5.404104000  |
| O  | 2.651441000  | -0.316478000 | 1.695523000  |
| O  | -2.091614000 | -1.152999000 | 1.437792000  |
| P  | 2.575846000  | -0.154296000 | -0.028734000 |
| P  | -1.889365000 | -1.051146000 | -0.282123000 |
| Ir | 0.355477000  | -0.565500000 | -0.478777000 |
| C  | 3.825376000  | -1.481214000 | -0.523422000 |
| C  | 3.185388000  | 1.626432000  | -0.198594000 |
| C  | -2.470877000 | -2.800765000 | -0.838148000 |
| C  | -3.121709000 | 0.349317000  | -0.599584000 |
| C  | 4.008205000  | -1.411309000 | -2.050771000 |
| H  | 4.529899000  | -2.329507000 | -2.393428000 |
| H  | 3.034247000  | -1.347678000 | -2.579151000 |
| H  | 4.625960000  | -0.544234000 | -2.353992000 |
| C  | 3.284579000  | 1.955087000  | -1.699632000 |
| H  | 2.376079000  | 1.636988000  | -2.251669000 |
| H  | 3.399312000  | 3.052867000  | -1.820001000 |
| H  | 4.163351000  | 1.474795000  | -2.171147000 |
| C  | 3.135558000  | -2.809761000 | -0.146446000 |
| H  | 2.972181000  | -2.890334000 | 0.946736000  |
| H  | 2.152237000  | -2.909551000 | -0.649466000 |
| H  | 3.786249000  | -3.652611000 | -0.460524000 |
| C  | 5.169508000  | -1.376252000 | 0.211114000  |
| H  | 5.763122000  | -2.291414000 | 0.002666000  |
| H  | 5.766778000  | -0.510279000 | -0.128545000 |
| H  | 5.030301000  | -1.303578000 | 1.307446000  |
| C  | 4.510648000  | 1.901428000  | 0.526133000  |
| H  | 5.372201000  | 1.430449000  | 0.017722000  |
| H  | 4.691178000  | 2.997179000  | 0.537667000  |
| H  | 4.482062000  | 1.550441000  | 1.576197000  |

|    |              |              |              |
|----|--------------|--------------|--------------|
| C  | 2.064119000  | 2.472801000  | 0.441794000  |
| H  | 1.084970000  | 2.280068000  | -0.041950000 |
| H  | 1.959348000  | 2.262623000  | 1.524817000  |
| H  | 2.316202000  | 3.547375000  | 0.323185000  |
| C  | -3.745667000 | -2.810267000 | -1.696026000 |
| H  | -3.631275000 | -2.225546000 | -2.628344000 |
| H  | -3.952807000 | -3.859978000 | -1.993049000 |
| H  | -4.634194000 | -2.443407000 | -1.149775000 |
| C  | -3.226776000 | 0.572259000  | -2.119300000 |
| H  | -3.736427000 | 1.540882000  | -2.305581000 |
| H  | -2.224210000 | 0.614004000  | -2.593852000 |
| H  | -3.818662000 | -0.215719000 | -2.620801000 |
| C  | -1.306998000 | -3.369903000 | -1.674767000 |
| H  | -0.368941000 | -3.413698000 | -1.085487000 |
| H  | -1.568809000 | -4.396845000 | -2.006534000 |
| H  | -1.103364000 | -2.748915000 | -2.569613000 |
| C  | -2.682481000 | -3.668676000 | 0.414590000  |
| H  | -3.516051000 | -3.299631000 | 1.042271000  |
| H  | -2.925428000 | -4.700970000 | 0.084862000  |
| H  | -1.772602000 | -3.719242000 | 1.044400000  |
| C  | -4.491294000 | 0.108944000  | 0.052794000  |
| H  | -5.107787000 | 1.025925000  | -0.059430000 |
| H  | -5.048839000 | -0.722177000 | -0.416979000 |
| H  | -4.388558000 | -0.101500000 | 1.135116000  |
| C  | -2.460844000 | 1.586061000  | 0.047092000  |
| H  | -2.336335000 | 1.461660000  | 1.140961000  |
| H  | -1.462660000 | 1.785569000  | -0.392378000 |
| H  | -3.111456000 | 2.468607000  | -0.127324000 |
| Cl | 0.419984000  | -0.248836000 | -2.884888000 |

**1a-TS3**, E = -2258.42980580841

67

|    |              |              |              |
|----|--------------|--------------|--------------|
| C  | -1.126791000 | -0.980298000 | 3.647277000  |
| C  | -1.075351000 | -0.850339000 | 2.249409000  |
| C  | 0.141004000  | -0.604629000 | 1.563990000  |
| C  | 1.326586000  | -0.540449000 | 2.336288000  |
| C  | 1.303273000  | -0.663994000 | 3.736211000  |
| C  | 0.070520000  | -0.879552000 | 4.379166000  |
| H  | -2.090788000 | -1.161031000 | 4.143833000  |
| H  | 2.241954000  | -0.594930000 | 4.304580000  |
| H  | 0.042973000  | -0.976660000 | 5.475075000  |
| O  | 2.535959000  | -0.354274000 | 1.700101000  |
| O  | -2.247850000 | -0.973178000 | 1.521444000  |
| P  | 2.477144000  | -0.246930000 | -0.013746000 |
| P  | -2.061887000 | -0.772113000 | -0.166202000 |
| Ir | 0.190342000  | -0.414188000 | -0.448024000 |
| C  | 3.552881000  | -1.727634000 | -0.506333000 |
| C  | 3.323185000  | 1.428633000  | -0.252166000 |
| C  | -2.051777000 | -2.499899000 | -0.966034000 |
| C  | -3.505529000 | 0.375051000  | -0.512073000 |
| C  | 3.341699000  | -1.950633000 | -2.016081000 |
| H  | 3.883674000  | -2.868717000 | -2.325767000 |
| H  | 2.267643000  | -2.081477000 | -2.255987000 |
| H  | 3.727793000  | -1.109559000 | -2.623521000 |

|    |              |              |              |
|----|--------------|--------------|--------------|
| C  | 3.700425000  | 1.583033000  | -1.735639000 |
| H  | 2.823704000  | 1.408351000  | -2.392382000 |
| H  | 4.054294000  | 2.621601000  | -1.907946000 |
| H  | 4.520874000  | 0.900190000  | -2.031868000 |
| C  | 3.006300000  | -2.936407000 | 0.278118000  |
| H  | 3.160678000  | -2.819880000 | 1.368009000  |
| H  | 1.924759000  | -3.098404000 | 0.096627000  |
| H  | 3.542954000  | -3.848659000 | -0.055479000 |
| C  | 5.042827000  | -1.552663000 | -0.179506000 |
| H  | 5.571619000  | -2.501938000 | -0.408869000 |
| H  | 5.515124000  | -0.757130000 | -0.786660000 |
| H  | 5.204868000  | -1.328299000 | 0.892913000  |
| C  | 4.541364000  | 1.619668000  | 0.666733000  |
| H  | 5.397235000  | 0.982033000  | 0.383836000  |
| H  | 4.872600000  | 2.676875000  | 0.590441000  |
| H  | 4.284191000  | 1.418242000  | 1.724428000  |
| C  | 2.245220000  | 2.467850000  | 0.123781000  |
| H  | 1.372737000  | 2.406360000  | -0.555662000 |
| H  | 1.895222000  | 2.334188000  | 1.167322000  |
| H  | 2.686478000  | 3.483477000  | 0.040095000  |
| C  | -3.193678000 | -2.859183000 | -1.924257000 |
| H  | -3.280244000 | -2.143159000 | -2.762802000 |
| H  | -2.989202000 | -3.859042000 | -2.361439000 |
| H  | -4.169087000 | -2.915245000 | -1.400403000 |
| C  | -3.564559000 | 0.640210000  | -2.026589000 |
| H  | -4.281210000 | 1.467257000  | -2.213184000 |
| H  | -2.573580000 | 0.943358000  | -2.424175000 |
| H  | -3.921001000 | -0.240501000 | -2.592918000 |
| C  | -0.707764000 | -2.318126000 | -1.692543000 |
| H  | 0.348868000  | -1.974743000 | -0.279902000 |
| H  | -0.092767000 | -3.236733000 | -1.758897000 |
| H  | -0.767168000 | -1.793765000 | -2.662911000 |
| C  | -1.941394000 | -3.547407000 | 0.152415000  |
| H  | -2.869760000 | -3.602468000 | 0.753203000  |
| H  | -1.763459000 | -4.540828000 | -0.309791000 |
| H  | -1.097997000 | -3.337699000 | 0.840949000  |
| C  | -4.816223000 | -0.215538000 | 0.028252000  |
| H  | -5.633573000 | 0.521151000  | -0.122315000 |
| H  | -5.100864000 | -1.145895000 | -0.500567000 |
| H  | -4.744846000 | -0.431714000 | 1.112065000  |
| C  | -3.142200000 | 1.678354000  | 0.227150000  |
| H  | -3.052784000 | 1.520451000  | 1.319757000  |
| H  | -2.187701000 | 2.098132000  | -0.150342000 |
| H  | -3.943421000 | 2.425761000  | 0.049832000  |
| Cl | 0.130927000  | 0.935569000  | -2.520784000 |

v, E = -2258.43569147583

67

|   |              |              |             |
|---|--------------|--------------|-------------|
| C | -1.140833000 | -0.864901000 | 3.678874000 |
| C | -1.089151000 | -0.793562000 | 2.277620000 |
| C | 0.115412000  | -0.490924000 | 1.591871000 |
| C | 1.305514000  | -0.403648000 | 2.355408000 |
| C | 1.278884000  | -0.465730000 | 3.759445000 |
| C | 0.049510000  | -0.684066000 | 4.407883000 |

|    |              |              |              |
|----|--------------|--------------|--------------|
| H  | -2.096062000 | -1.074939000 | 4.180541000  |
| H  | 2.215112000  | -0.360711000 | 4.326396000  |
| H  | 0.021235000  | -0.735332000 | 5.506822000  |
| O  | 2.514467000  | -0.276362000 | 1.710948000  |
| O  | -2.239643000 | -1.057544000 | 1.548481000  |
| P  | 2.475678000  | -0.274302000 | -0.012451000 |
| P  | -2.067943000 | -0.845503000 | -0.139416000 |
| Ir | 0.166984000  | -0.509958000 | -0.438831000 |
| C  | 3.564392000  | -1.782963000 | -0.402465000 |
| C  | 3.332937000  | 1.390786000  | -0.301696000 |
| C  | -2.029989000 | -2.487402000 | -1.076505000 |
| C  | -3.480205000 | 0.350389000  | -0.462455000 |
| C  | 3.358535000  | -2.088315000 | -1.898399000 |
| H  | 3.913213000  | -3.013725000 | -2.160127000 |
| H  | 2.286408000  | -2.245437000 | -2.131620000 |
| H  | 3.736080000  | -1.274560000 | -2.548214000 |
| C  | 3.615126000  | 1.540565000  | -1.806067000 |
| H  | 2.689671000  | 1.408174000  | -2.402054000 |
| H  | 4.001266000  | 2.564056000  | -1.998568000 |
| H  | 4.384265000  | 0.825126000  | -2.159325000 |
| C  | 3.022533000  | -2.948759000 | 0.446326000  |
| H  | 3.158828000  | -2.763447000 | 1.529287000  |
| H  | 1.947068000  | -3.139644000 | 0.256523000  |
| H  | 3.578613000  | -3.870684000 | 0.177113000  |
| C  | 5.054946000  | -1.591776000 | -0.088931000 |
| H  | 5.577084000  | -2.558205000 | -0.252445000 |
| H  | 5.529649000  | -0.845299000 | -0.753272000 |
| H  | 5.222362000  | -1.293091000 | 0.964014000  |
| C  | 4.614258000  | 1.563016000  | 0.533065000  |
| H  | 5.459501000  | 0.961883000  | 0.156594000  |
| H  | 4.916820000  | 2.630222000  | 0.482674000  |
| H  | 4.441712000  | 1.310672000  | 1.597223000  |
| C  | 2.308611000  | 2.450026000  | 0.159359000  |
| H  | 1.375847000  | 2.400286000  | -0.433295000 |
| H  | 2.062479000  | 2.333597000  | 1.233738000  |
| H  | 2.760336000  | 3.455188000  | 0.022323000  |
| C  | -3.207821000 | -2.868813000 | -1.977284000 |
| H  | -3.417390000 | -2.104528000 | -2.748093000 |
| H  | -2.956257000 | -3.812077000 | -2.506458000 |
| H  | -4.132272000 | -3.049009000 | -1.392100000 |
| C  | -3.586837000 | 0.638208000  | -1.969122000 |
| H  | -4.319392000 | 1.459715000  | -2.114771000 |
| H  | -2.613167000 | 0.964641000  | -2.386533000 |
| H  | -3.953255000 | -0.234742000 | -2.540385000 |
| C  | -0.751180000 | -2.060710000 | -1.845675000 |
| H  | 0.441738000  | -1.958295000 | 0.101138000  |
| H  | -0.045134000 | -2.895005000 | -2.023062000 |
| H  | -0.975038000 | -1.518345000 | -2.783713000 |
| C  | -1.756751000 | -3.614518000 | -0.069656000 |
| H  | -2.650661000 | -3.827860000 | 0.548662000  |
| H  | -1.492988000 | -4.534688000 | -0.631686000 |
| H  | -0.914136000 | -3.380733000 | 0.611396000  |
| C  | -4.783522000 | -0.240388000 | 0.099766000  |
| H  | -5.599018000 | 0.501583000  | -0.033374000 |



|    |              |              |              |
|----|--------------|--------------|--------------|
| H  | -5.080555000 | -1.166007000 | -0.431280000 |
| H  | -4.695583000 | -0.463973000 | 1.180616000  |
| C  | -3.082978000 | 1.638733000  | 0.284519000  |
| H  | -2.956975000 | 1.465216000  | 1.371253000  |
| H  | -2.141018000 | 2.055066000  | -0.124858000 |
| H  | -3.886944000 | 2.391908000  | 0.148589000  |
| Cl | -0.036804000 | 1.246676000  | -2.176878000 |

**1g**, E = -2373.54614224156

72

|    |              |              |              |
|----|--------------|--------------|--------------|
| C  | -0.285323000 | 1.190784000  | -3.625752000 |
| C  | -0.148731000 | 1.177763000  | -2.232078000 |
| C  | -0.087348000 | -0.024343000 | -1.483624000 |
| C  | -0.152841000 | -1.229636000 | -2.216161000 |
| C  | -0.290049000 | -1.267478000 | -3.616177000 |
| C  | -0.354586000 | -0.042480000 | -4.315235000 |
| H  | -0.337251000 | 2.134885000  | -4.184815000 |
| H  | -0.341289000 | -2.237897000 | -4.124416000 |
| O  | -0.078857000 | -2.431747000 | -1.535970000 |
| O  | -0.070562000 | 2.384465000  | -1.561973000 |
| P  | 0.036255000  | -2.298929000 | 0.170412000  |
| P  | 0.046642000  | 2.269364000  | 0.145303000  |
| Ir | 0.088378000  | -0.012723000 | 0.522120000  |
| H  | 1.615190000  | -0.017281000 | 0.304312000  |
| C  | 1.581931000  | -3.327277000 | 0.497748000  |
| C  | -1.584083000 | -3.122413000 | 0.685109000  |
| C  | 1.597616000  | 3.293933000  | 0.459096000  |
| C  | -1.568805000 | 3.106017000  | 0.653796000  |
| C  | 1.921024000  | -3.212863000 | 1.996118000  |
| H  | 2.940295000  | -3.618879000 | 2.165125000  |
| H  | 1.898406000  | -2.160099000 | 2.343991000  |
| H  | 1.220579000  | -3.792331000 | 2.626451000  |
| C  | -1.517709000 | -3.446752000 | 2.187232000  |
| H  | -1.165900000 | -2.574350000 | 2.777154000  |
| H  | -2.535091000 | -3.714469000 | 2.542622000  |
| H  | -0.854961000 | -4.309201000 | 2.395354000  |
| C  | 2.698897000  | -2.666695000 | -0.335913000 |
| H  | 2.473055000  | -2.690757000 | -1.419648000 |
| H  | 2.866238000  | -1.613107000 | -0.035996000 |
| H  | 3.644038000  | -3.222585000 | -0.164954000 |
| C  | 1.424695000  | -4.794216000 | 0.070530000  |
| H  | 2.406830000  | -5.303450000 | 0.166505000  |
| H  | 0.705790000  | -5.339552000 | 0.711473000  |
| H  | 1.099114000  | -4.881135000 | -0.984810000 |
| C  | -1.932793000 | -4.361216000 | -0.152716000 |
| H  | -1.248970000 | -5.207893000 | 0.038398000  |
| H  | -2.959040000 | -4.692178000 | 0.113214000  |
| H  | -1.914984000 | -4.132640000 | -1.235737000 |
| C  | -2.644481000 | -2.026619000 | 0.440339000  |
| H  | -2.466676000 | -1.141291000 | 1.086344000  |
| H  | -2.666676000 | -1.694267000 | -0.616971000 |
| H  | -3.648315000 | -2.426665000 | 0.694926000  |
| C  | 1.938231000  | 3.195253000  | 1.958248000  |
| H  | 1.910326000  | 2.146818000  | 2.318591000  |

|    |              |              |              |
|----|--------------|--------------|--------------|
| H  | 2.960003000  | 3.597451000  | 2.121118000  |
| H  | 1.241963000  | 3.786012000  | 2.582669000  |
| C  | -1.497411000 | 3.449401000  | 2.151449000  |
| H  | -2.512897000 | 3.725255000  | 2.506010000  |
| H  | -1.147196000 | 2.583334000  | 2.751560000  |
| H  | -0.831197000 | 4.312162000  | 2.346913000  |
| C  | 2.710412000  | 2.618631000  | -0.368286000 |
| H  | 2.873388000  | 1.567836000  | -0.056340000 |
| H  | 2.483359000  | 2.631179000  | -1.451962000 |
| H  | 3.658287000  | 3.172152000  | -0.204957000 |
| C  | 1.446414000  | 4.756463000  | 0.015085000  |
| H  | 0.730487000  | 5.312330000  | 0.650298000  |
| H  | 2.430828000  | 5.262514000  | 0.104309000  |
| H  | 1.120223000  | 4.832452000  | -1.040906000 |
| C  | -1.914358000 | 4.335294000  | -0.199246000 |
| H  | -2.937980000 | 4.675031000  | 0.065685000  |
| H  | -1.225599000 | 5.180964000  | -0.021764000 |
| H  | -1.901216000 | 4.092321000  | -1.279191000 |
| C  | -2.634145000 | 2.011395000  | 0.426109000  |
| H  | -2.660104000 | 1.664610000  | -0.626490000 |
| H  | -2.458274000 | 1.134395000  | 1.083942000  |
| H  | -3.635896000 | 2.418763000  | 0.677175000  |
| O  | -0.487520000 | 0.047346000  | -5.671405000 |
| C  | -0.555662000 | -1.157092000 | -6.421000000 |
| H  | 0.364965000  | -1.769582000 | -6.300680000 |
| H  | -1.433914000 | -1.774470000 | -6.129810000 |
| H  | -0.657206000 | -0.860456000 | -7.481167000 |
| Cl | 0.037208000  | 0.000733000  | 2.992865000  |

**1g<sup>+</sup>**, E = -2373.36581469379

72

|    |              |              |              |
|----|--------------|--------------|--------------|
| C  | -0.278129000 | 1.199043000  | -3.607736000 |
| C  | -0.149960000 | 1.201262000  | -2.227864000 |
| C  | -0.087987000 | -0.025105000 | -1.468626000 |
| C  | -0.158444000 | -1.261560000 | -2.211965000 |
| C  | -0.287357000 | -1.289821000 | -3.598018000 |
| C  | -0.346276000 | -0.051750000 | -4.291210000 |
| H  | -0.325350000 | 2.132589000  | -4.183054000 |
| H  | -0.337683000 | -2.253485000 | -4.117570000 |
| O  | -0.095528000 | -2.434769000 | -1.534451000 |
| O  | -0.078635000 | 2.386057000  | -1.562608000 |
| P  | 0.025437000  | -2.329740000 | 0.186799000  |
| P  | 0.037207000  | 2.300348000  | 0.154582000  |
| Ir | 0.068045000  | -0.013399000 | 0.487546000  |
| H  | 1.603235000  | -0.016569000 | 0.273991000  |
| C  | 1.591773000  | -3.317838000 | 0.499352000  |
| C  | -1.594036000 | -3.149494000 | 0.685706000  |
| C  | 1.607398000  | 3.282755000  | 0.465403000  |
| C  | -1.578859000 | 3.131270000  | 0.646519000  |
| C  | 1.958143000  | -3.137111000 | 1.985357000  |
| H  | 2.949406000  | -3.604045000 | 2.159463000  |
| H  | 2.025824000  | -2.067571000 | 2.267123000  |
| H  | 1.232362000  | -3.626724000 | 2.661196000  |
| C  | -1.519042000 | -3.491978000 | 2.184126000  |

|    |              |              |              |
|----|--------------|--------------|--------------|
| H  | -1.196704000 | -2.621245000 | 2.791289000  |
| H  | -2.531524000 | -3.789451000 | 2.527427000  |
| H  | -0.837113000 | -4.341331000 | 2.382239000  |
| C  | 2.680299000  | -2.679017000 | -0.386277000 |
| H  | 2.449454000  | -2.774269000 | -1.464702000 |
| H  | 2.834813000  | -1.606889000 | -0.149491000 |
| H  | 3.638253000  | -3.202849000 | -0.191077000 |
| C  | 1.430728000  | -4.802114000 | 0.138101000  |
| H  | 2.418095000  | -5.297703000 | 0.243133000  |
| H  | 0.726070000  | -5.321883000 | 0.814689000  |
| H  | 1.093267000  | -4.939282000 | -0.907818000 |
| C  | -1.927392000 | -4.383884000 | -0.165983000 |
| H  | -1.227057000 | -5.220490000 | 0.006516000  |
| H  | -2.942804000 | -4.732763000 | 0.115439000  |
| H  | -1.935732000 | -4.144997000 | -1.246585000 |
| C  | -2.657144000 | -2.054821000 | 0.449400000  |
| H  | -2.493409000 | -1.176030000 | 1.107723000  |
| H  | -2.687964000 | -1.716408000 | -0.606028000 |
| H  | -3.657315000 | -2.465713000 | 0.698133000  |
| C  | 1.963534000  | 3.127319000  | 1.956565000  |
| H  | 2.016704000  | 2.062854000  | 2.259993000  |
| H  | 2.959245000  | 3.585929000  | 2.127431000  |
| H  | 1.239863000  | 3.638781000  | 2.618265000  |
| C  | -1.505633000 | 3.493146000  | 2.140228000  |
| H  | -2.517945000 | 3.797331000  | 2.478179000  |
| H  | -1.185900000 | 2.629933000  | 2.759328000  |
| H  | -0.822250000 | 4.343632000  | 2.328115000  |
| C  | 2.698395000  | 2.622429000  | -0.401254000 |
| H  | 2.850077000  | 1.555748000  | -0.139077000 |
| H  | 2.471810000  | 2.693269000  | -1.482475000 |
| H  | 3.656636000  | 3.148830000  | -0.214483000 |
| C  | 1.457079000  | 4.761149000  | 0.075705000  |
| H  | 0.750538000  | 5.296933000  | 0.737650000  |
| H  | 2.446277000  | 5.253638000  | 0.178154000  |
| H  | 1.127093000  | 4.880447000  | -0.974806000 |
| C  | -1.907047000 | 4.355663000  | -0.221571000 |
| H  | -2.922459000 | 4.710702000  | 0.052089000  |
| H  | -1.204946000 | 5.192543000  | -0.057339000 |
| H  | -1.912115000 | 4.103091000  | -1.299062000 |
| C  | -2.645580000 | 2.037340000  | 0.422892000  |
| H  | -2.676299000 | 1.685469000  | -0.628136000 |
| H  | -2.485013000 | 1.166435000  | 1.092501000  |
| H  | -3.644844000 | 2.454142000  | 0.665377000  |
| O  | -0.469023000 | 0.040587000  | -5.617383000 |
| C  | -0.545595000 | -1.149105000 | -6.415476000 |
| H  | 0.374676000  | -1.756831000 | -6.301567000 |
| H  | -1.432655000 | -1.752494000 | -6.135719000 |
| H  | -0.640519000 | -0.804718000 | -7.459493000 |
| Cl | -0.107296000 | 0.004875000  | 2.894728000  |

**1b'**, E = -2486.8412664915

74

|   |              |             |              |
|---|--------------|-------------|--------------|
| C | -0.286191000 | 1.168603000 | -3.631908000 |
| C | -0.147245000 | 1.166194000 | -2.239680000 |

|    |              |              |              |
|----|--------------|--------------|--------------|
| C  | -0.081470000 | -0.037928000 | -1.491881000 |
| C  | -0.149484000 | -1.255532000 | -2.216983000 |
| C  | -0.288606000 | -1.288126000 | -3.610079000 |
| C  | -0.356146000 | -0.065422000 | -4.317058000 |
| H  | -0.338664000 | 2.110749000  | -4.194078000 |
| H  | -0.341465000 | -2.248087000 | -4.139095000 |
| O  | -0.076432000 | -2.449513000 | -1.526730000 |
| O  | -0.072039000 | 2.372797000  | -1.572594000 |
| P  | 0.037589000  | -2.312617000 | 0.178182000  |
| P  | 0.045339000  | 2.268350000  | 0.134277000  |
| Ir | 0.087894000  | -0.019036000 | 0.505373000  |
| H  | 1.608899000  | -0.023896000 | 0.246853000  |
| C  | 1.585944000  | -3.331952000 | 0.514123000  |
| C  | -1.583061000 | -3.131126000 | 0.696181000  |
| C  | 1.598739000  | 3.287632000  | 0.446683000  |
| C  | -1.570697000 | 3.103422000  | 0.639951000  |
| C  | 1.924322000  | -3.204571000 | 2.011619000  |
| H  | 2.940696000  | -3.616003000 | 2.184270000  |
| H  | 1.910950000  | -2.148232000 | 2.348513000  |
| H  | 1.220056000  | -3.772606000 | 2.647982000  |
| C  | -1.517964000 | -3.450741000 | 2.199298000  |
| H  | -1.170589000 | -2.575894000 | 2.787886000  |
| H  | -2.535328000 | -3.720414000 | 2.552900000  |
| H  | -0.853294000 | -4.310786000 | 2.410770000  |
| C  | 2.701462000  | -2.675783000 | -0.324864000 |
| H  | 2.476901000  | -2.708767000 | -1.408599000 |
| H  | 2.868875000  | -1.619961000 | -0.032332000 |
| H  | 3.647174000  | -3.229018000 | -0.149186000 |
| C  | 1.429907000  | -4.802543000 | 0.098929000  |
| H  | 2.412410000  | -5.309603000 | 0.201067000  |
| H  | 0.710436000  | -5.342849000 | 0.743432000  |
| H  | 1.106710000  | -4.898994000 | -0.956292000 |
| C  | -1.928862000 | -4.373426000 | -0.137979000 |
| H  | -1.244852000 | -5.218804000 | 0.058046000  |
| H  | -2.955155000 | -4.703555000 | 0.128306000  |
| H  | -1.910353000 | -4.149679000 | -1.221952000 |
| C  | -2.642971000 | -2.036259000 | 0.445275000  |
| H  | -2.467766000 | -1.148313000 | 1.088330000  |
| H  | -2.665899000 | -1.709512000 | -0.613807000 |
| H  | -3.646782000 | -2.435667000 | 0.700394000  |
| C  | 1.940098000  | 3.188722000  | 1.945603000  |
| H  | 1.924938000  | 2.139194000  | 2.303013000  |
| H  | 2.957849000  | 3.600925000  | 2.107978000  |
| H  | 1.238642000  | 3.770709000  | 2.572395000  |
| C  | -1.500720000 | 3.453041000  | 2.136147000  |
| H  | -2.516198000 | 3.733920000  | 2.486453000  |
| H  | -1.155664000 | 2.588815000  | 2.741555000  |
| H  | -0.832219000 | 4.314529000  | 2.328828000  |
| C  | 2.709611000  | 2.610459000  | -0.381641000 |
| H  | 2.872742000  | 1.559632000  | -0.069342000 |
| H  | 2.483115000  | 2.623837000  | -1.465390000 |
| H  | 3.658187000  | 3.162561000  | -0.218293000 |
| C  | 1.447585000  | 4.750220000  | 0.002458000  |
| H  | 0.731967000  | 5.306228000  | 0.637772000  |

|    |              |              |              |
|----|--------------|--------------|--------------|
| H  | 2.432381000  | 5.255212000  | 0.091978000  |
| H  | 1.122018000  | 4.826692000  | -1.053652000 |
| C  | -1.913871000 | 4.329910000  | -0.218334000 |
| H  | -2.938067000 | 4.669542000  | 0.044026000  |
| H  | -1.225880000 | 5.176269000  | -0.041428000 |
| H  | -1.899253000 | 4.084162000  | -1.297575000 |
| C  | -2.635203000 | 2.007564000  | 0.414051000  |
| H  | -2.661287000 | 1.658457000  | -0.637817000 |
| H  | -2.461740000 | 1.132930000  | 1.075529000  |
| H  | -3.637110000 | 2.415959000  | 0.662292000  |
| Cl | -0.001381000 | 0.004763000  | 2.963275000  |
| C  | -0.501465000 | -0.021479000 | -5.795610000 |
| O  | -0.565625000 | 1.005819000  | -6.463523000 |
| O  | -0.557011000 | -1.257573000 | -6.350589000 |
| C  | -0.695094000 | -1.294988000 | -7.777521000 |
| H  | -1.627276000 | -0.787011000 | -8.096806000 |
| H  | 0.164271000  | -0.796913000 | -8.269881000 |
| H  | -0.727468000 | -2.363516000 | -8.053748000 |

**1b<sup>++</sup>**, E = -2486.64140888882

74

|    |              |              |              |
|----|--------------|--------------|--------------|
| C  | -0.281501000 | 1.179883000  | -3.616551000 |
| C  | -0.153037000 | 1.191091000  | -2.229192000 |
| C  | -0.090619000 | -0.036924000 | -1.469945000 |
| C  | -0.163912000 | -1.278276000 | -2.206764000 |
| C  | -0.292652000 | -1.295625000 | -3.595649000 |
| C  | -0.349882000 | -0.063147000 | -4.285944000 |
| H  | -0.327129000 | 2.114408000  | -4.190667000 |
| H  | -0.345256000 | -2.247994000 | -4.136823000 |
| O  | -0.102694000 | -2.449032000 | -1.527661000 |
| O  | -0.081359000 | 2.373999000  | -1.571833000 |
| P  | 0.023385000  | -2.345202000 | 0.192556000  |
| P  | 0.036469000  | 2.300800000  | 0.149877000  |
| Ir | 0.066139000  | -0.019531000 | 0.482905000  |
| H  | 1.603375000  | -0.024102000 | 0.269519000  |
| C  | 1.594548000  | -3.323517000 | 0.504934000  |
| C  | -1.596724000 | -3.159355000 | 0.696202000  |
| C  | 1.609521000  | 3.279217000  | 0.451246000  |
| C  | -1.583221000 | 3.128983000  | 0.632148000  |
| C  | 1.966452000  | -3.124312000 | 1.987266000  |
| H  | 2.950516000  | -3.604524000 | 2.165437000  |
| H  | 2.054615000  | -2.051826000 | 2.251162000  |
| H  | 1.235256000  | -3.590985000 | 2.673382000  |
| C  | -1.518786000 | -3.501561000 | 2.194521000  |
| H  | -1.200560000 | -2.630795000 | 2.803311000  |
| H  | -2.530459000 | -3.802646000 | 2.536757000  |
| H  | -0.834467000 | -4.349017000 | 2.392308000  |
| C  | 2.675530000  | -2.691646000 | -0.394385000 |
| H  | 2.442439000  | -2.805553000 | -1.470386000 |
| H  | 2.826301000  | -1.615080000 | -0.174917000 |
| H  | 3.636994000  | -3.206694000 | -0.193748000 |
| C  | 1.431884000  | -4.811778000 | 0.161468000  |
| H  | 2.420328000  | -5.304548000 | 0.268363000  |
| H  | 0.730834000  | -5.324053000 | 0.847377000  |

|    |              |              |              |
|----|--------------|--------------|--------------|
| H  | 1.090803000  | -4.961475000 | -0.881472000 |
| C  | -1.930481000 | -4.394289000 | -0.154636000 |
| H  | -1.228476000 | -5.229898000 | 0.015702000  |
| H  | -2.944125000 | -4.743770000 | 0.131947000  |
| H  | -1.944316000 | -4.156151000 | -1.235228000 |
| C  | -2.657309000 | -2.062545000 | 0.458635000  |
| H  | -2.493895000 | -1.183567000 | 1.116950000  |
| H  | -2.689474000 | -1.726121000 | -0.597420000 |
| H  | -3.658029000 | -2.471443000 | 0.707957000  |
| C  | 1.968678000  | 3.119298000  | 1.941425000  |
| H  | 2.040753000  | 2.054043000  | 2.237788000  |
| H  | 2.957996000  | 3.591396000  | 2.112043000  |
| H  | 1.239526000  | 3.616347000  | 2.608048000  |
| C  | -1.509644000 | 3.502068000  | 2.123186000  |
| H  | -2.522175000 | 3.810763000  | 2.455992000  |
| H  | -1.193745000 | 2.644091000  | 2.751040000  |
| H  | -0.825337000 | 4.353029000  | 2.304994000  |
| C  | 2.695197000  | 2.617879000  | -0.420998000 |
| H  | 2.845763000  | 1.549769000  | -0.163215000 |
| H  | 2.467852000  | 2.694612000  | -1.501571000 |
| H  | 3.655319000  | 3.140328000  | -0.233426000 |
| C  | 1.456237000  | 4.758134000  | 0.065196000  |
| H  | 0.751566000  | 5.292047000  | 0.730570000  |
| H  | 2.445842000  | 5.249692000  | 0.166748000  |
| H  | 1.124443000  | 4.880075000  | -0.984330000 |
| C  | -1.910676000 | 4.346978000  | -0.245040000 |
| H  | -2.923520000 | 4.706326000  | 0.032035000  |
| H  | -1.205585000 | 5.183091000  | -0.090549000 |
| H  | -1.923147000 | 4.086433000  | -1.320449000 |
| C  | -2.645850000 | 2.030132000  | 0.413928000  |
| H  | -2.675758000 | 1.671677000  | -0.634920000 |
| H  | -2.486359000 | 1.164722000  | 1.091028000  |
| H  | -3.646352000 | 2.446395000  | 0.651670000  |
| Cl | -0.123727000 | 0.004165000  | 2.874826000  |
| C  | -0.486188000 | -0.016317000 | -5.780903000 |
| O  | -0.540207000 | 1.021579000  | -6.424611000 |
| O  | -0.540445000 | -1.244414000 | -6.323021000 |
| C  | -0.669375000 | -1.296516000 | -7.755726000 |
| H  | -1.600265000 | -0.789573000 | -8.077630000 |
| H  | 0.195636000  | -0.800949000 | -8.238776000 |
| H  | -0.699619000 | -2.367578000 | -8.018317000 |

**1a-COOCF<sub>3</sub>**, E = -2324.98845763412

74

|   |              |              |             |
|---|--------------|--------------|-------------|
| C | -1.164224000 | -0.633842000 | 3.626920000 |
| C | -1.094936000 | -0.666896000 | 2.223453000 |
| C | 0.119318000  | -0.479973000 | 1.520923000 |
| C | 1.290479000  | -0.334550000 | 2.302090000 |
| C | 1.257379000  | -0.296955000 | 3.706726000 |
| C | 0.020045000  | -0.438753000 | 4.359256000 |
| H | -2.134282000 | -0.770079000 | 4.126232000 |
| H | 2.193668000  | -0.168945000 | 4.268796000 |
| H | -0.020299000 | -0.408896000 | 5.458630000 |
| O | 2.515913000  | -0.244307000 | 1.666309000 |

|    |              |              |              |
|----|--------------|--------------|--------------|
| O  | -2.254381000 | -0.907623000 | 1.508720000  |
| P  | 2.477292000  | -0.368379000 | -0.035219000 |
| P  | -2.084483000 | -0.940220000 | -0.189244000 |
| Ir | 0.196756000  | -0.558523000 | -0.486103000 |
| H  | 0.379242000  | -2.067601000 | -0.177926000 |
| C  | 3.453666000  | -1.963888000 | -0.357135000 |
| C  | 3.437028000  | 1.209575000  | -0.452664000 |
| C  | -2.631923000 | -2.702742000 | -0.626616000 |
| C  | -3.365533000 | 0.388223000  | -0.618770000 |
| C  | 3.125547000  | -2.390049000 | -1.801569000 |
| H  | 3.644728000  | -3.345864000 | -2.023527000 |
| H  | 2.036995000  | -2.543476000 | -1.938713000 |
| H  | 3.461458000  | -1.642875000 | -2.547535000 |
| C  | 3.742539000  | 1.224479000  | -1.959716000 |
| H  | 2.828449000  | 1.116894000  | -2.575457000 |
| H  | 4.202504000  | 2.199665000  | -2.224204000 |
| H  | 4.457328000  | 0.430554000  | -2.252796000 |
| C  | 2.919930000  | -3.014409000 | 0.636404000  |
| H  | 3.159163000  | -2.742705000 | 1.682478000  |
| H  | 1.823212000  | -3.149734000 | 0.555675000  |
| H  | 3.398689000  | -3.989644000 | 0.410106000  |
| C  | 4.971873000  | -1.834994000 | -0.166320000 |
| H  | 5.427901000  | -2.838577000 | -0.300019000 |
| H  | 5.435974000  | -1.161949000 | -0.911886000 |
| H  | 5.234097000  | -1.480579000 | 0.849172000  |
| C  | 4.723391000  | 1.363677000  | 0.378539000  |
| H  | 5.525608000  | 0.673341000  | 0.067211000  |
| H  | 5.101672000  | 2.398298000  | 0.239861000  |
| H  | 4.525101000  | 1.217898000  | 1.457878000  |
| C  | 2.481811000  | 2.365467000  | -0.088908000 |
| H  | 1.556321000  | 2.339270000  | -0.692398000 |
| H  | 2.211467000  | 2.342463000  | 0.985785000  |
| H  | 3.001772000  | 3.326242000  | -0.286265000 |
| C  | -2.126187000 | -2.969596000 | -2.058110000 |
| H  | -1.026026000 | -2.858563000 | -2.124565000 |
| H  | -2.392556000 | -4.007650000 | -2.347669000 |
| H  | -2.582484000 | -2.285265000 | -2.800571000 |
| C  | -3.573578000 | 0.415844000  | -2.141777000 |
| H  | -4.258358000 | 1.252055000  | -2.395753000 |
| H  | -2.628508000 | 0.590596000  | -2.691068000 |
| H  | -4.035355000 | -0.516965000 | -2.521047000 |
| C  | -1.921931000 | -3.643187000 | 0.366530000  |
| H  | -0.821672000 | -3.512997000 | 0.352224000  |
| H  | -2.276881000 | -3.482875000 | 1.402681000  |
| H  | -2.142269000 | -4.692154000 | 0.079032000  |
| C  | -4.145776000 | -2.943950000 | -0.538190000 |
| H  | -4.709963000 | -2.364689000 | -1.293506000 |
| H  | -4.341042000 | -4.019237000 | -0.734749000 |
| H  | -4.546274000 | -2.709221000 | 0.466820000  |
| C  | -4.700935000 | 0.187735000  | 0.120539000  |
| H  | -5.302029000 | 1.113816000  | 0.003119000  |
| H  | -5.297872000 | -0.647615000 | -0.283292000 |
| H  | -4.541489000 | 0.023007000  | 1.203556000  |
| C  | -2.738941000 | 1.714425000  | -0.139293000 |

|   |              |              |              |
|---|--------------|--------------|--------------|
| H | -2.546490000 | 1.698966000  | 0.952109000  |
| H | -1.794910000 | 1.937385000  | -0.668803000 |
| H | -3.457024000 | 2.535982000  | -0.343792000 |
| O | 0.276604000  | -0.489798000 | -2.762718000 |
| C | 0.103299000  | 0.762691000  | -2.819933000 |
| O | -0.040700000 | 1.496071000  | -1.804520000 |
| C | 0.072395000  | 1.446336000  | -4.203426000 |
| F | 0.201856000  | 0.566570000  | -5.210591000 |
| F | 1.079505000  | 2.347738000  | -4.299796000 |
| F | -1.094242000 | 2.112552000  | -4.372789000 |

**1a-COOCF<sub>3</sub><sup>+</sup>**, E = -2324.79466267829

74

|    |              |              |              |
|----|--------------|--------------|--------------|
| C  | -1.166282000 | -0.704350000 | 3.622270000  |
| C  | -1.110227000 | -0.775298000 | 2.229747000  |
| C  | 0.137348000  | -0.616790000 | 1.514567000  |
| C  | 1.338228000  | -0.485955000 | 2.310831000  |
| C  | 1.285258000  | -0.414991000 | 3.703502000  |
| C  | 0.032226000  | -0.518387000 | 4.340128000  |
| H  | -2.131750000 | -0.806178000 | 4.135601000  |
| H  | 2.212298000  | -0.293546000 | 4.279575000  |
| H  | -0.010286000 | -0.465664000 | 5.438272000  |
| O  | 2.539377000  | -0.439854000 | 1.684172000  |
| O  | -2.245590000 | -1.005422000 | 1.525589000  |
| P  | 2.518196000  | -0.416414000 | -0.035424000 |
| P  | -2.117157000 | -0.973098000 | -0.189130000 |
| Ir | 0.215809000  | -0.734260000 | -0.429789000 |
| H  | 0.376866000  | -2.232759000 | -0.020785000 |
| C  | 3.673080000  | -1.840008000 | -0.454122000 |
| C  | 3.198544000  | 1.325314000  | -0.314720000 |
| C  | -2.867546000 | -2.630638000 | -0.665336000 |
| C  | -3.176007000 | 0.554540000  | -0.534867000 |
| C  | 3.605245000  | -2.041397000 | -1.980867000 |
| H  | 4.189962000  | -2.948619000 | -2.237607000 |
| H  | 2.567395000  | -2.193581000 | -2.337163000 |
| H  | 4.046822000  | -1.193256000 | -2.538157000 |
| C  | 3.534279000  | 1.505620000  | -1.804633000 |
| H  | 2.671549000  | 1.296864000  | -2.465624000 |
| H  | 3.820277000  | 2.565057000  | -1.969533000 |
| H  | 4.391187000  | 0.879433000  | -2.119193000 |
| C  | 3.101879000  | -3.078247000 | 0.265028000  |
| H  | 3.099842000  | -2.956578000 | 1.365513000  |
| H  | 2.073074000  | -3.318139000 | -0.070150000 |
| H  | 3.743060000  | -3.948384000 | 0.016516000  |
| C  | 5.116529000  | -1.593754000 | 0.010069000  |
| H  | 5.695698000  | -2.526059000 | -0.152779000 |
| H  | 5.610812000  | -0.792891000 | -0.570897000 |
| H  | 5.171407000  | -1.345848000 | 1.087860000  |
| C  | 4.428931000  | 1.607899000  | 0.565205000  |
| H  | 5.320597000  | 1.039008000  | 0.250068000  |
| H  | 4.670176000  | 2.686841000  | 0.469943000  |
| H  | 4.229102000  | 1.398194000  | 1.633103000  |
| C  | 2.055371000  | 2.275869000  | 0.100832000  |
| H  | 1.164424000  | 2.164035000  | -0.544487000 |



|   |              |              |              |
|---|--------------|--------------|--------------|
| H | 1.759493000  | 2.135904000  | 1.159638000  |
| H | 2.418000000  | 3.318777000  | -0.005596000 |
| C | -2.632005000 | -2.810089000 | -2.178150000 |
| H | -1.560995000 | -2.723512000 | -2.447373000 |
| H | -2.974992000 | -3.825390000 | -2.465198000 |
| H | -3.205417000 | -2.082453000 | -2.783853000 |
| C | -3.448273000 | 0.651947000  | -2.045406000 |
| H | -3.972257000 | 1.610197000  | -2.241675000 |
| H | -2.519351000 | 0.662420000  | -2.647162000 |
| H | -4.104368000 | -0.163260000 | -2.406579000 |
| C | -2.081788000 | -3.699897000 | 0.119228000  |
| H | -1.001567000 | -3.690906000 | -0.128506000 |
| H | -2.197898000 | -3.582580000 | 1.214007000  |
| H | -2.477858000 | -4.696381000 | -0.163932000 |
| C | -4.360878000 | -2.732042000 | -0.320446000 |
| H | -4.980876000 | -2.067685000 | -0.950830000 |
| H | -4.690091000 | -3.773732000 | -0.514417000 |
| H | -4.558895000 | -2.508156000 | 0.745709000  |
| C | -4.491954000 | 0.532169000  | 0.262673000  |
| H | -4.976324000 | 1.522891000  | 0.139473000  |
| H | -5.200853000 | -0.231926000 | -0.100175000 |
| H | -4.315880000 | 0.373138000  | 1.343434000  |
| C | -2.323145000 | 1.751196000  | -0.062084000 |
| H | -2.070243000 | 1.684663000  | 1.014877000  |
| H | -1.392488000 | 1.857003000  | -0.649663000 |
| H | -2.918131000 | 2.676418000  | -0.204890000 |
| O | 0.356904000  | -1.266950000 | -2.671300000 |
| C | 0.221030000  | -0.055088000 | -2.998843000 |
| O | 0.081659000  | 0.857438000  | -2.128005000 |
| C | 0.222702000  | 0.354473000  | -4.486338000 |
| F | 0.365889000  | -0.709437000 | -5.286417000 |
| F | 1.236214000  | 1.214863000  | -4.723681000 |
| F | -0.936942000 | 0.974704000  | -4.792819000 |

**2a-COOCF<sub>3</sub>**, E = -2323.77517756488

72

|    |              |              |              |
|----|--------------|--------------|--------------|
| C  | -1.048950000 | -0.919147000 | 3.690904000  |
| C  | -1.004366000 | -0.711843000 | 2.301380000  |
| C  | 0.214481000  | -0.538227000 | 1.601091000  |
| C  | 1.409253000  | -0.639045000 | 2.355275000  |
| C  | 1.400587000  | -0.836610000 | 3.746326000  |
| C  | 0.162940000  | -0.969600000 | 4.402682000  |
| H  | -2.017759000 | -1.044265000 | 4.195383000  |
| H  | 2.350959000  | -0.893897000 | 4.296222000  |
| H  | 0.143710000  | -1.125850000 | 5.491963000  |
| O  | 2.626572000  | -0.551677000 | 1.699636000  |
| O  | -2.191738000 | -0.688912000 | 1.588297000  |
| P  | 2.530565000  | -0.395905000 | 0.000305000  |
| P  | -2.015213000 | -0.492859000 | -0.099735000 |
| Ir | 0.245038000  | -0.284977000 | -0.388937000 |
| C  | 3.654762000  | -1.791998000 | -0.572274000 |
| C  | 3.237024000  | 1.338654000  | -0.237495000 |
| C  | -1.869330000 | -2.255862000 | -0.770705000 |
| C  | -3.582317000 | 0.473179000  | -0.455197000 |

|   |              |              |              |
|---|--------------|--------------|--------------|
| C | 3.463931000  | -1.933537000 | -2.094623000 |
| H | 4.001647000  | -2.840843000 | -2.440559000 |
| H | 2.394635000  | -2.039721000 | -2.365476000 |
| H | 3.871109000  | -1.068520000 | -2.651417000 |
| C | 3.560220000  | 1.544542000  | -1.727668000 |
| H | 2.721600000  | 1.238256000  | -2.385350000 |
| H | 3.754966000  | 2.622281000  | -1.908900000 |
| H | 4.466043000  | 0.986181000  | -2.034968000 |
| C | 3.143730000  | -3.060052000 | 0.139848000  |
| H | 3.255534000  | -2.983192000 | 1.238371000  |
| H | 2.081840000  | -3.266285000 | -0.091251000 |
| H | 3.740965000  | -3.927079000 | -0.211245000 |
| C | 5.129957000  | -1.559799000 | -0.215053000 |
| H | 5.708772000  | -2.468932000 | -0.482585000 |
| H | 5.567864000  | -0.711521000 | -0.775052000 |
| H | 5.265921000  | -1.379788000 | 0.869524000  |
| C | 4.451306000  | 1.638530000  | 0.652421000  |
| H | 5.351007000  | 1.074449000  | 0.346835000  |
| H | 4.690640000  | 2.720245000  | 0.574619000  |
| H | 4.236307000  | 1.410943000  | 1.714375000  |
| C | 2.060267000  | 2.252280000  | 0.177830000  |
| H | 1.162069000  | 2.105939000  | -0.470342000 |
| H | 1.773987000  | 2.103178000  | 1.237719000  |
| H | 2.360869000  | 3.314360000  | 0.053651000  |
| C | -2.291265000 | -2.320289000 | -2.245609000 |
| H | -1.801362000 | -1.531006000 | -2.850129000 |
| H | -1.980157000 | -3.301401000 | -2.661596000 |
| H | -3.389553000 | -2.238519000 | -2.364422000 |
| C | -3.615972000 | 0.843824000  | -1.948135000 |
| H | -4.502749000 | 1.487209000  | -2.126753000 |
| H | -2.715362000 | 1.417267000  | -2.241946000 |
| H | -3.706956000 | -0.040084000 | -2.605936000 |
| C | -0.317844000 | -2.272684000 | -0.638276000 |
| H | 0.008774000  | -2.871049000 | 0.234417000  |
| H | 0.183364000  | -2.629956000 | -1.561246000 |
| C | -2.564467000 | -3.325850000 | 0.073597000  |
| H | -3.667046000 | -3.256011000 | -0.013673000 |
| H | -2.257609000 | -4.332014000 | -0.282134000 |
| H | -2.294259000 | -3.241601000 | 1.144174000  |
| C | -4.809169000 | -0.358656000 | -0.048407000 |
| H | -5.723266000 | 0.258245000  | -0.179107000 |
| H | -4.921250000 | -1.262526000 | -0.679345000 |
| H | -4.756117000 | -0.671439000 | 1.012663000  |
| C | -3.473223000 | 1.757050000  | 0.390486000  |
| H | -3.445441000 | 1.533851000  | 1.474102000  |
| H | -2.565800000 | 2.335312000  | 0.121956000  |
| H | -4.358834000 | 2.394605000  | 0.187088000  |
| O | 0.314178000  | -0.027456000 | -2.558781000 |
| C | -0.069671000 | 1.125093000  | -2.968317000 |
| O | -0.379600000 | 2.121999000  | -2.301407000 |
| C | -0.169912000 | 1.180579000  | -4.516478000 |
| F | -1.155386000 | 0.348614000  | -4.952206000 |
| F | 0.985345000  | 0.785766000  | -5.102717000 |
| F | -0.457787000 | 2.417422000  | -4.962871000 |

**2a-COOCF<sub>3</sub><sup>+</sup>**, E = -2323.58322784433

72

|    |              |              |              |
|----|--------------|--------------|--------------|
| C  | -1.152228000 | -0.640827000 | 3.607707000  |
| C  | -1.117908000 | -0.540544000 | 2.216903000  |
| C  | 0.127641000  | -0.458280000 | 1.492384000  |
| C  | 1.344008000  | -0.580693000 | 2.259621000  |
| C  | 1.315992000  | -0.676963000 | 3.653758000  |
| C  | 0.069952000  | -0.695212000 | 4.309013000  |
| H  | -2.116575000 | -0.693111000 | 4.130613000  |
| H  | 2.257967000  | -0.749769000 | 4.213839000  |
| H  | 0.048635000  | -0.773785000 | 5.406203000  |
| O  | 2.537408000  | -0.623548000 | 1.612975000  |
| O  | -2.285514000 | -0.537331000 | 1.511859000  |
| P  | 2.500095000  | -0.343020000 | -0.082979000 |
| P  | -2.120636000 | -0.628226000 | -0.188817000 |
| Ir | 0.141484000  | -0.342778000 | -0.454152000 |
| C  | 3.553920000  | -1.741387000 | -0.779809000 |
| C  | 3.328236000  | 1.363505000  | -0.108738000 |
| C  | -1.908575000 | -2.462892000 | -0.563154000 |
| C  | -3.631271000 | 0.319862000  | -0.728224000 |
| C  | 3.198259000  | -1.805425000 | -2.280216000 |
| H  | 3.768841000  | -2.637544000 | -2.741238000 |
| H  | 2.120376000  | -1.995511000 | -2.446169000 |
| H  | 3.468423000  | -0.876421000 | -2.819850000 |
| C  | 3.598370000  | 1.752859000  | -1.572123000 |
| H  | 2.683798000  | 1.731905000  | -2.194880000 |
| H  | 3.982916000  | 2.793485000  | -1.593459000 |
| H  | 4.364299000  | 1.107823000  | -2.044423000 |
| C  | 3.110760000  | -3.031855000 | -0.065480000 |
| H  | 3.355229000  | -3.005466000 | 1.013543000  |
| H  | 2.030109000  | -3.229997000 | -0.178787000 |
| H  | 3.654580000  | -3.883428000 | -0.523245000 |
| C  | 5.066076000  | -1.555043000 | -0.591335000 |
| H  | 5.570223000  | -2.463672000 | -0.980976000 |
| H  | 5.461498000  | -0.691595000 | -1.158084000 |
| H  | 5.344281000  | -1.448159000 | 0.474390000  |
| C  | 4.623155000  | 1.390194000  | 0.723246000  |
| H  | 5.453853000  | 0.840581000  | 0.250325000  |
| H  | 4.937475000  | 2.450001000  | 0.820848000  |
| H  | 4.462799000  | 0.991405000  | 1.743185000  |
| C  | 2.316042000  | 2.333670000  | 0.535667000  |
| H  | 1.371808000  | 2.399777000  | -0.034064000 |
| H  | 2.091964000  | 2.061435000  | 1.586125000  |
| H  | 2.772222000  | 3.344871000  | 0.548469000  |
| C  | -2.418527000 | -2.808695000 | -1.968796000 |
| H  | -2.014594000 | -2.124421000 | -2.740975000 |
| H  | -2.075414000 | -3.833889000 | -2.218459000 |
| H  | -3.524570000 | -2.800395000 | -2.018503000 |
| C  | -3.680725000 | 0.340385000  | -2.266755000 |
| H  | -4.483132000 | 1.042353000  | -2.572445000 |
| H  | -2.737641000 | 0.703905000  | -2.720143000 |
| H  | -3.918166000 | -0.648996000 | -2.697249000 |
| C  | -0.350841000 | -2.390168000 | -0.541137000 |

|   |              |              |              |
|---|--------------|--------------|--------------|
| H | 0.079438000  | -2.951169000 | 0.307537000  |
| H | 0.105005000  | -2.727561000 | -1.493349000 |
| C | -2.496140000 | -3.387635000 | 0.504557000  |
| H | -3.602906000 | -3.338007000 | 0.514004000  |
| H | -2.201323000 | -4.431949000 | 0.272927000  |
| H | -2.124661000 | -3.146828000 | 1.519268000  |
| C | -4.883559000 | -0.343564000 | -0.131792000 |
| H | -5.770484000 | 0.258622000  | -0.418800000 |
| H | -5.032466000 | -1.369951000 | -0.521617000 |
| H | -4.839594000 | -0.383043000 | 0.973556000  |
| C | -3.424615000 | 1.747451000  | -0.183664000 |
| H | -3.358154000 | 1.762614000  | 0.921162000  |
| H | -2.509938000 | 2.211652000  | -0.604236000 |
| H | -4.295010000 | 2.365330000  | -0.485711000 |
| O | 0.121963000  | -0.243665000 | -2.749535000 |
| C | 0.064750000  | 1.019192000  | -2.722951000 |
| O | 0.052425000  | 1.665731000  | -1.632660000 |
| C | 0.042588000  | 1.786721000  | -4.060983000 |
| F | -0.856466000 | 1.235205000  | -4.899813000 |
| F | 1.264457000  | 1.713613000  | -4.636507000 |
| F | -0.268680000 | 3.077637000  | -3.882585000 |

**1c**, E = -2187.23778815058

72

|    |              |              |              |
|----|--------------|--------------|--------------|
| Ir | -0.000368000 | -0.431242000 | -0.039484000 |
| C  | -0.019441000 | 1.597508000  | -0.032802000 |
| P  | -2.324980000 | -0.199253000 | -0.120308000 |
| P  | 2.322283000  | -0.148318000 | 0.048005000  |
| C  | -2.476843000 | 1.569258000  | -0.677032000 |
| C  | -3.310476000 | -1.192183000 | -1.412131000 |
| C  | -3.114209000 | -0.248236000 | 1.617413000  |
| C  | 2.445643000  | 1.629774000  | 0.584099000  |
| C  | 3.260280000  | -1.094544000 | 1.411785000  |
| C  | 3.191197000  | -0.238796000 | -1.644308000 |
| C  | -1.220164000 | 2.326737000  | -0.306616000 |
| C  | -1.236942000 | 3.733890000  | -0.262388000 |
| C  | -0.066376000 | 4.456769000  | 0.018913000  |
| C  | 1.160704000  | 2.354543000  | 0.249220000  |
| C  | 1.127911000  | 3.762788000  | 0.267212000  |
| H  | -2.178901000 | 4.270133000  | -0.463431000 |
| H  | -0.084930000 | 5.557355000  | 0.041565000  |
| H  | 2.052288000  | 4.321439000  | 0.488107000  |
| H  | -2.580230000 | 1.529122000  | -1.783506000 |
| H  | -3.398440000 | 2.057156000  | -0.298610000 |
| H  | 2.584584000  | 1.606077000  | 1.686432000  |
| H  | 3.344505000  | 2.134373000  | 0.173380000  |
| C  | -3.545011000 | -2.625626000 | -0.905414000 |
| C  | -2.406950000 | -1.250933000 | -2.660767000 |
| C  | -4.646696000 | -0.524436000 | -1.780567000 |
| C  | -2.926801000 | -1.643956000 | 2.241694000  |
| C  | -4.599588000 | 0.140479000  | 1.621641000  |
| C  | -2.310169000 | 0.770759000  | 2.452540000  |
| C  | 2.816237000  | -1.576237000 | -2.309331000 |
| C  | 2.627715000  | 0.917347000  | -2.494698000 |

|    |              |              |              |
|----|--------------|--------------|--------------|
| C  | 4.717130000  | -0.091148000 | -1.547674000 |
| C  | 3.523853000  | -2.542232000 | 0.963457000  |
| C  | 4.574178000  | -0.414440000 | 1.833734000  |
| C  | 2.285095000  | -1.110941000 | 2.608819000  |
| H  | -2.693695000 | 0.759933000  | 3.494548000  |
| H  | -1.230494000 | 0.514653000  | 2.481983000  |
| H  | -2.396883000 | 1.804691000  | 2.065417000  |
| H  | -4.783015000 | 1.121698000  | 1.139400000  |
| H  | -4.950675000 | 0.217240000  | 2.673009000  |
| H  | -5.228311000 | -0.620339000 | 1.120354000  |
| H  | -3.615733000 | -2.390903000 | 1.806742000  |
| H  | -3.144392000 | -1.582229000 | 3.329101000  |
| H  | -1.893913000 | -2.023383000 | 2.107006000  |
| H  | -5.341352000 | -0.464192000 | -0.922596000 |
| H  | -5.142630000 | -1.129712000 | -2.569346000 |
| H  | -4.509035000 | 0.496272000  | -2.188664000 |
| H  | -2.149526000 | -0.241890000 | -3.043433000 |
| H  | -1.464284000 | -1.789792000 | -2.443872000 |
| H  | -2.944429000 | -1.788333000 | -3.470557000 |
| H  | -3.922486000 | -3.246708000 | -1.745589000 |
| H  | -4.306173000 | -2.661352000 | -0.102311000 |
| H  | -2.604770000 | -3.078268000 | -0.529820000 |
| H  | 3.045259000  | 0.839062000  | -3.520615000 |
| H  | 1.523314000  | 0.875617000  | -2.570334000 |
| H  | 2.905416000  | 1.911475000  | -2.093187000 |
| H  | 3.214732000  | -2.447376000 | -1.756565000 |
| H  | 3.235783000  | -1.603451000 | -3.337352000 |
| H  | 1.716259000  | -1.692095000 | -2.374729000 |
| H  | 5.014971000  | 0.840846000  | -1.026170000 |
| H  | 5.141051000  | -0.046334000 | -2.573581000 |
| H  | 5.189420000  | -0.949389000 | -1.032671000 |
| H  | 3.923114000  | -3.118271000 | 1.825709000  |
| H  | 4.277408000  | -2.597586000 | 0.153691000  |
| H  | 2.586986000  | -3.029667000 | 0.626195000  |
| H  | 1.997444000  | -0.089617000 | 2.934362000  |
| H  | 1.366752000  | -1.679863000 | 2.361125000  |
| H  | 2.776942000  | -1.606828000 | 3.472633000  |
| H  | 5.323459000  | -0.393262000 | 1.021857000  |
| H  | 5.013968000  | -0.987842000 | 2.677823000  |
| H  | 4.418140000  | 0.622628000  | 2.190630000  |
| H  | 0.032771000  | -0.181377000 | -1.561392000 |
| Cl | -0.032384000 | -2.890221000 | 0.330947000  |

**1c<sup>+</sup>**, E = -2187.04868964158

72

|    |              |              |              |
|----|--------------|--------------|--------------|
| Ir | 0.001523000  | -0.391266000 | -0.075333000 |
| C  | -0.018667000 | 1.592866000  | -0.038987000 |
| P  | -2.357807000 | -0.195798000 | -0.122999000 |
| P  | 2.362360000  | -0.147561000 | 0.024133000  |
| C  | -2.493161000 | 1.573714000  | -0.665393000 |
| C  | -3.341428000 | -1.179773000 | -1.413896000 |
| C  | -3.082521000 | -0.257912000 | 1.634821000  |
| C  | 2.464934000  | 1.628291000  | 0.558234000  |
| C  | 3.230168000  | -1.099022000 | 1.420486000  |

|   |              |              |              |
|---|--------------|--------------|--------------|
| C | 3.226223000  | -0.249664000 | -1.660806000 |
| C | -1.245675000 | 2.326470000  | -0.289633000 |
| C | -1.255126000 | 3.723218000  | -0.229051000 |
| C | -0.067045000 | 4.431730000  | 0.035008000  |
| C | 1.185716000  | 2.351650000  | 0.234445000  |
| C | 1.144804000  | 3.749497000  | 0.256551000  |
| H | -2.191131000 | 4.273150000  | -0.408740000 |
| H | -0.085240000 | 5.531654000  | 0.065636000  |
| H | 2.062752000  | 4.320101000  | 0.463293000  |
| H | -2.573191000 | 1.544539000  | -1.774455000 |
| H | -3.414090000 | 2.071951000  | -0.302395000 |
| H | 2.597096000  | 1.615423000  | 1.661536000  |
| H | 3.357067000  | 2.146723000  | 0.153208000  |
| C | -3.615613000 | -2.603265000 | -0.899672000 |
| C | -2.437863000 | -1.255502000 | -2.661378000 |
| C | -4.661003000 | -0.474582000 | -1.776906000 |
| C | -2.796101000 | -1.634205000 | 2.264480000  |
| C | -4.589083000 | 0.040302000  | 1.651573000  |
| C | -2.329088000 | 0.816315000  | 2.445599000  |
| C | 2.872175000  | -1.600095000 | -2.310784000 |
| C | 2.655310000  | 0.892888000  | -2.523879000 |
| C | 4.749382000  | -0.086355000 | -1.538958000 |
| C | 3.507143000  | -2.548221000 | 0.986247000  |
| C | 4.534241000  | -0.417893000 | 1.871768000  |
| C | 2.214990000  | -1.092096000 | 2.583933000  |
| H | -2.692756000 | 0.784186000  | 3.493411000  |
| H | -1.234534000 | 0.631732000  | 2.469145000  |
| H | -2.496059000 | 1.842404000  | 2.063998000  |
| H | -4.835109000 | 1.005894000  | 1.166352000  |
| H | -4.927182000 | 0.104199000  | 2.707236000  |
| H | -5.177300000 | -0.761047000 | 1.165174000  |
| H | -3.350947000 | -2.451957000 | 1.770752000  |
| H | -3.111676000 | -1.606135000 | 3.328133000  |
| H | -1.718389000 | -1.888399000 | 2.232913000  |
| H | -5.344068000 | -0.377999000 | -0.913416000 |
| H | -5.180101000 | -1.082676000 | -2.547188000 |
| H | -4.498633000 | 0.531466000  | -2.210449000 |
| H | -2.143430000 | -0.252777000 | -3.034483000 |
| H | -1.520914000 | -1.842909000 | -2.461395000 |
| H | -2.997850000 | -1.758261000 | -3.477073000 |
| H | -4.038951000 | -3.203355000 | -1.731993000 |
| H | -4.356363000 | -2.612221000 | -0.077177000 |
| H | -2.686943000 | -3.099300000 | -0.555248000 |
| H | 3.092367000  | 0.815059000  | -3.540803000 |
| H | 1.553627000  | 0.830895000  | -2.629115000 |
| H | 2.910427000  | 1.895246000  | -2.127966000 |
| H | 3.264935000  | -2.460836000 | -1.738759000 |
| H | 3.318082000  | -1.635171000 | -3.326413000 |
| H | 1.776526000  | -1.728753000 | -2.412273000 |
| H | 5.032202000  | 0.854634000  | -1.025886000 |
| H | 5.185663000  | -0.051081000 | -2.559158000 |
| H | 5.219395000  | -0.935557000 | -1.007599000 |
| H | 3.871297000  | -3.117670000 | 1.866902000  |
| H | 4.293440000  | -2.605037000 | 0.208885000  |

|    |              |              |              |
|----|--------------|--------------|--------------|
| H  | 2.59065000   | -3.044491000 | 0.611976000  |
| H  | 1.926095000  | -0.065626000 | 2.891856000  |
| H  | 1.300213000  | -1.663302000 | 2.327859000  |
| H  | 2.675214000  | -1.579378000 | 3.468725000  |
| H  | 5.299617000  | -0.393988000 | 1.075174000  |
| H  | 4.953428000  | -0.998993000 | 2.719994000  |
| H  | 4.373045000  | 0.615945000  | 2.234707000  |
| H  | 0.013010000  | -0.216125000 | -1.616071000 |
| Cl | -0.014980000 | -2.799070000 | 0.090284000  |

**2c**, E = -2186.02347449488

70

|    |              |              |              |
|----|--------------|--------------|--------------|
| Ir | 0.006208000  | -0.367672000 | 0.238763000  |
| C  | -0.072729000 | 1.657167000  | 0.138388000  |
| P  | -2.317304000 | -0.228081000 | -0.065162000 |
| P  | 2.275590000  | -0.031860000 | 0.345729000  |
| C  | -2.572219000 | 1.581424000  | -0.405284000 |
| C  | -3.290345000 | -1.136371000 | -1.422709000 |
| C  | -3.022253000 | -0.502619000 | 1.692335000  |
| C  | 2.434066000  | 1.795343000  | 0.608045000  |
| C  | 3.629051000  | -0.822163000 | 1.407362000  |
| C  | 2.330260000  | -0.327308000 | -1.541720000 |
| C  | -1.295546000 | 2.351702000  | -0.134766000 |
| C  | -1.331361000 | 3.759296000  | -0.198266000 |
| C  | -0.163978000 | 4.519244000  | -0.032997000 |
| C  | 1.107104000  | 2.457769000  | 0.298599000  |
| C  | 1.052716000  | 3.862255000  | 0.204778000  |
| H  | -2.290556000 | 4.264831000  | -0.397973000 |
| H  | -0.201057000 | 5.617794000  | -0.095505000 |
| H  | 1.978342000  | 4.447749000  | 0.329610000  |
| H  | -2.855831000 | 1.686058000  | -1.473292000 |
| H  | -3.429987000 | 1.984844000  | 0.169475000  |
| H  | 2.688004000  | 1.935836000  | 1.680621000  |
| H  | 3.272979000  | 2.234460000  | 0.031068000  |
| C  | -3.080443000 | -2.656125000 | -1.285153000 |
| C  | -2.671084000 | -0.687352000 | -2.762205000 |
| C  | -4.785740000 | -0.785197000 | -1.392697000 |
| C  | -3.173536000 | -2.007233000 | 1.972350000  |
| C  | -4.341998000 | 0.224652000  | 1.984283000  |
| C  | -1.908929000 | 0.065318000  | 2.602230000  |
| C  | 0.782183000  | -0.377571000 | -1.686452000 |
| C  | 2.976335000  | 0.812599000  | -2.333988000 |
| C  | 2.946594000  | -1.678151000 | -1.923943000 |
| C  | 3.642479000  | -2.350398000 | 1.223048000  |
| C  | 4.995728000  | -0.211054000 | 1.058079000  |
| C  | 3.242294000  | -0.513940000 | 2.868259000  |
| H  | -2.172009000 | -0.105196000 | 3.668380000  |
| H  | -0.930617000 | -0.458290000 | 2.437377000  |
| H  | -1.749016000 | 1.150777000  | 2.452558000  |
| H  | -4.255145000 | 1.323303000  | 1.871213000  |
| H  | -4.635792000 | 0.027622000  | 3.037596000  |
| H  | -5.167683000 | -0.128338000 | 1.337718000  |
| H  | -4.052815000 | -2.434421000 | 1.452824000  |
| H  | -3.330651000 | -2.153444000 | 3.062499000  |

|    |              |              |              |
|----|--------------|--------------|--------------|
| H  | -2.267711000 | -2.572316000 | 1.670683000  |
| H  | -5.281377000 | -1.169107000 | -0.480034000 |
| H  | -5.288612000 | -1.254694000 | -2.265365000 |
| H  | -4.963147000 | 0.307640000  | -1.454301000 |
| H  | -2.799805000 | 0.395470000  | -2.957373000 |
| H  | -1.591205000 | -0.923402000 | -2.810385000 |
| H  | -3.177160000 | -1.232960000 | -3.586125000 |
| H  | -3.426092000 | -3.151839000 | -2.216980000 |
| H  | -3.662251000 | -3.081952000 | -0.447647000 |
| H  | -2.013513000 | -2.908004000 | -1.117477000 |
| H  | 2.865554000  | 0.613062000  | -3.421249000 |
| H  | 2.496046000  | 1.788569000  | -2.124304000 |
| H  | 4.060604000  | 0.898434000  | -2.115452000 |
| H  | 0.443689000  | -1.325709000 | -2.151817000 |
| H  | 0.389237000  | 0.487481000  | -2.257327000 |
| H  | 4.039330000  | -1.706140000 | -1.741297000 |
| H  | 2.783350000  | -1.847019000 | -3.009578000 |
| H  | 2.464285000  | -2.510016000 | -1.374689000 |
| H  | 4.261319000  | -2.798540000 | 2.029165000  |
| H  | 4.088435000  | -2.649074000 | 0.257571000  |
| H  | 2.619521000  | -2.774822000 | 1.280267000  |
| H  | 3.221685000  | 0.571517000  | 3.089608000  |
| H  | 2.248917000  | -0.940190000 | 3.114977000  |
| H  | 3.992321000  | -0.975926000 | 3.544360000  |
| H  | 5.269313000  | -0.398397000 | 0.000031000  |
| H  | 5.780254000  | -0.673593000 | 1.694809000  |
| H  | 5.023584000  | 0.882398000  | 1.236540000  |
| Cl | 0.087216000  | -2.863618000 | 0.493342000  |

**2c<sup>+</sup>**, E = -2185.84314527639

70

|    |              |              |              |
|----|--------------|--------------|--------------|
| Ir | 0.043563000  | -0.402576000 | 0.221175000  |
| C  | -0.014310000 | 1.593523000  | 0.162231000  |
| P  | -2.323947000 | -0.242272000 | -0.067687000 |
| P  | 2.349054000  | -0.089414000 | 0.300769000  |
| C  | -2.426451000 | 1.508031000  | -0.666913000 |
| C  | -3.228745000 | -1.331535000 | -1.332281000 |
| C  | -3.145056000 | -0.221781000 | 1.658903000  |
| C  | 2.466091000  | 1.693924000  | 0.769804000  |
| C  | 3.677286000  | -1.001573000 | 1.279723000  |
| C  | 2.336542000  | -0.198231000 | -1.611745000 |
| C  | -1.240406000 | 2.284638000  | -0.157655000 |
| C  | -1.294358000 | 3.683536000  | -0.081626000 |
| C  | -0.150340000 | 4.424340000  | 0.262542000  |
| C  | 1.152581000  | 2.375614000  | 0.478030000  |
| C  | 1.069744000  | 3.774970000  | 0.517928000  |
| H  | -2.234890000 | 4.204334000  | -0.317194000 |
| H  | -0.206502000 | 5.521979000  | 0.316770000  |
| H  | 1.966709000  | 4.366000000  | 0.757676000  |
| H  | -2.357689000 | 1.454396000  | -1.774438000 |
| H  | -3.391026000 | 1.999440000  | -0.437674000 |
| H  | 2.668510000  | 1.710197000  | 1.862040000  |
| H  | 3.317086000  | 2.211854000  | 0.284275000  |
| C  | -2.868898000 | -2.803553000 | -1.054521000 |



|    |              |              |              |
|----|--------------|--------------|--------------|
| C  | -2.695876000 | -0.956582000 | -2.728941000 |
| C  | -4.749850000 | -1.115891000 | -1.290120000 |
| C  | -3.439136000 | -1.661341000 | 2.115659000  |
| C  | -4.427736000 | 0.624679000  | 1.695762000  |
| C  | -2.101734000 | 0.404510000  | 2.609250000  |
| C  | 0.819692000  | -0.495095000 | -1.699451000 |
| C  | 2.713711000  | 1.133797000  | -2.268683000 |
| C  | 3.162079000  | -1.345929000 | -2.204036000 |
| C  | 3.719381000  | -2.489722000 | 0.891191000  |
| C  | 5.036634000  | -0.325825000 | 1.032949000  |
| C  | 3.252033000  | -0.883481000 | 2.757917000  |
| H  | -2.514737000 | 0.411894000  | 3.639788000  |
| H  | -1.159900000 | -0.187188000 | 2.642794000  |
| H  | -1.851921000 | 1.448795000  | 2.338470000  |
| H  | -4.233568000 | 1.692612000  | 1.475960000  |
| H  | -4.848239000 | 0.575695000  | 2.722228000  |
| H  | -5.204935000 | 0.257213000  | 1.000821000  |
| H  | -4.259112000 | -2.125211000 | 1.534908000  |
| H  | -3.762531000 | -1.631733000 | 3.177267000  |
| H  | -2.540342000 | -2.305624000 | 2.051107000  |
| H  | -5.196979000 | -1.461739000 | -0.339048000 |
| H  | -5.215030000 | -1.705003000 | -2.108335000 |
| H  | -5.025351000 | -0.053664000 | -1.446992000 |
| H  | -3.003677000 | 0.058160000  | -3.047946000 |
| H  | -1.593491000 | -1.031932000 | -2.791933000 |
| H  | -3.118850000 | -1.671808000 | -3.464196000 |
| H  | -3.323014000 | -3.433744000 | -1.847113000 |
| H  | -3.250097000 | -3.159600000 | -0.080892000 |
| H  | -1.773154000 | -2.964546000 | -1.069802000 |
| H  | 2.581451000  | 1.041759000  | -3.366607000 |
| H  | 2.077568000  | 1.972538000  | -1.925411000 |
| H  | 3.773621000  | 1.391837000  | -2.074037000 |
| H  | 0.600049000  | -1.547743000 | -1.982144000 |
| H  | 0.267170000  | 0.196661000  | -2.364590000 |
| H  | 4.247899000  | -1.193896000 | -2.045630000 |
| H  | 2.982620000  | -1.378058000 | -3.298811000 |
| H  | 2.872382000  | -2.328687000 | -1.787411000 |
| H  | 4.368413000  | -3.017553000 | 1.620493000  |
| H  | 4.151498000  | -2.651208000 | -0.111986000 |
| H  | 2.712794000  | -2.949801000 | 0.934337000  |
| H  | 3.201243000  | 0.165900000  | 3.109830000  |
| H  | 2.269713000  | -1.366380000 | 2.929972000  |
| H  | 4.007247000  | -1.404319000 | 3.382514000  |
| H  | 5.329540000  | -0.363476000 | -0.035433000 |
| H  | 5.814343000  | -0.864897000 | 1.613947000  |
| H  | 5.047736000  | 0.731296000  | 1.364233000  |
| Cl | 0.040991000  | -2.566999000 | 1.269048000  |

(<sup>Me4</sup>POCOP)IrHCl, E = -1787.81800846986

32

|   |              |              |             |
|---|--------------|--------------|-------------|
| C | -1.872427000 | -0.250477000 | 3.440205000 |
| C | -1.741872000 | -0.353952000 | 2.044606000 |
| C | -0.476726000 | -0.498977000 | 1.428091000 |
| C | 0.664902000  | -0.560747000 | 2.261482000 |

|    |              |              |              |
|----|--------------|--------------|--------------|
| C  | 0.561203000  | -0.459649000 | 3.659527000  |
| C  | -0.713095000 | -0.305235000 | 4.235278000  |
| H  | -2.870174000 | -0.129326000 | 3.885931000  |
| H  | 1.469875000  | -0.502252000 | 4.277086000  |
| H  | -0.804566000 | -0.223473000 | 5.328949000  |
| O  | 1.911356000  | -0.724524000 | 1.684608000  |
| O  | -2.875725000 | -0.313485000 | 1.253278000  |
| P  | 1.926856000  | -0.746123000 | -0.023919000 |
| P  | -2.591305000 | -0.364876000 | -0.430674000 |
| Ir | -0.301597000 | -0.560746000 | -0.574407000 |
| Cl | -0.020113000 | 0.466470000  | -2.746089000 |
| C  | 2.876603000  | -2.263716000 | -0.353360000 |
| H  | 3.827596000  | -2.251235000 | 0.214833000  |
| H  | 2.267967000  | -3.139815000 | -0.059767000 |
| H  | 3.089656000  | -2.315301000 | -1.439559000 |
| C  | 3.061498000  | 0.626785000  | -0.403193000 |
| H  | 4.045977000  | 0.474479000  | 0.080718000  |
| H  | 3.178082000  | 0.676243000  | -1.504418000 |
| H  | 2.603342000  | 1.570865000  | -0.051275000 |
| C  | -3.706548000 | -1.710866000 | -0.939487000 |
| H  | -3.726491000 | -1.751535000 | -2.046651000 |
| H  | -3.315660000 | -2.668817000 | -0.547342000 |
| H  | -4.728884000 | -1.528775000 | -0.553434000 |
| C  | -3.395861000 | 1.169319000  | -0.992194000 |
| H  | -3.300222000 | 1.218124000  | -2.095489000 |
| H  | -4.463365000 | 1.189960000  | -0.698023000 |
| H  | -2.859681000 | 2.030832000  | -0.550181000 |
| H  | -0.464949000 | -2.049073000 | -0.135308000 |

(<sup>Me</sup>4POCOP)IrCl<sup>+</sup>, E = -1787.00765908448

31

|    |              |              |              |
|----|--------------|--------------|--------------|
| C  | -1.897534000 | -0.578265000 | 3.386097000  |
| C  | -1.760493000 | -0.271844000 | 2.030232000  |
| C  | -0.451515000 | -0.274652000 | 1.405741000  |
| C  | 0.712585000  | -0.455645000 | 2.251612000  |
| C  | 0.561586000  | -0.760918000 | 3.606209000  |
| C  | -0.737113000 | -0.813921000 | 4.148837000  |
| H  | -2.898388000 | -0.620230000 | 3.836437000  |
| H  | 1.449980000  | -0.943067000 | 4.225814000  |
| H  | -0.850022000 | -1.045931000 | 5.218725000  |
| O  | 1.949357000  | -0.341224000 | 1.718554000  |
| O  | -2.853454000 | 0.015447000  | 1.288705000  |
| P  | 2.006123000  | -0.198272000 | 0.000084000  |
| P  | -2.583614000 | 0.145404000  | -0.410517000 |
| Ir | -0.261538000 | 0.003921000  | -0.483464000 |
| Cl | -0.001605000 | 1.846607000  | -1.848269000 |
| C  | 2.909046000  | -1.705903000 | -0.447526000 |
| H  | 3.881256000  | -1.739403000 | 0.081792000  |
| H  | 2.294576000  | -2.589353000 | -0.190394000 |
| H  | 3.073271000  | -1.684368000 | -1.543785000 |
| C  | 3.143079000  | 1.191750000  | -0.217190000 |
| H  | 4.088522000  | 0.992826000  | 0.323696000  |
| H  | 3.343214000  | 1.299572000  | -1.301777000 |
| H  | 2.664247000  | 2.115885000  | 0.156922000  |

|   |              |              |              |
|---|--------------|--------------|--------------|
| C | -3.607103000 | -1.216152000 | -1.033101000 |
| H | -3.570969000 | -1.183054000 | -2.140656000 |
| H | -3.185902000 | -2.178307000 | -0.685188000 |
| H | -4.651548000 | -1.098502000 | -0.683963000 |
| C | -3.445520000 | 1.685929000  | -0.805552000 |
| H | -3.427842000 | 1.810897000  | -1.906511000 |
| H | -4.492116000 | 1.634697000  | -0.447805000 |
| H | -2.911767000 | 2.533027000  | -0.335665000 |

**TS5<sup>+</sup>**, E = -1866.73756034541

39

|    |              |              |              |
|----|--------------|--------------|--------------|
| C  | -1.898012000 | -0.308292000 | 3.566588000  |
| C  | -1.768326000 | -0.260535000 | 2.175866000  |
| C  | -0.470111000 | -0.317720000 | 1.541271000  |
| C  | 0.685409000  | -0.475215000 | 2.396498000  |
| C  | 0.556836000  | -0.523317000 | 3.787261000  |
| C  | -0.733082000 | -0.440903000 | 4.347397000  |
| H  | -2.892207000 | -0.246728000 | 4.029103000  |
| H  | 1.448919000  | -0.626740000 | 4.419423000  |
| H  | -0.834825000 | -0.478835000 | 5.442663000  |
| O  | 1.915516000  | -0.585589000 | 1.832131000  |
| O  | -2.879590000 | -0.165912000 | 1.401602000  |
| P  | 1.973768000  | -0.286081000 | 0.138465000  |
| P  | -2.586423000 | 0.097494000  | -0.273882000 |
| Ir | -0.275185000 | -0.082321000 | -0.398668000 |
| Cl | 0.023750000  | 1.397473000  | -2.327409000 |
| C  | 2.991618000  | -1.665702000 | -0.445471000 |
| H  | 3.939970000  | -1.701935000 | 0.125423000  |
| H  | 2.435076000  | -2.613718000 | -0.320018000 |
| H  | 3.211741000  | -1.501815000 | -1.519437000 |
| C  | 2.998417000  | 1.207807000  | 0.060298000  |
| H  | 3.991791000  | 1.023484000  | 0.512791000  |
| H  | 3.102260000  | 1.480487000  | -1.009142000 |
| H  | 2.474846000  | 2.027175000  | 0.588535000  |
| C  | -3.696695000 | -1.115558000 | -1.033396000 |
| H  | -3.685293000 | -0.957024000 | -2.130222000 |
| H  | -3.338845000 | -2.136615000 | -0.801843000 |
| H  | -4.726271000 | -0.976497000 | -0.649694000 |
| C  | -3.323180000 | 1.734783000  | -0.527265000 |
| H  | -3.191227000 | 1.993388000  | -1.597133000 |
| H  | -4.397290000 | 1.725225000  | -0.259502000 |
| H  | -2.773970000 | 2.472319000  | 0.088481000  |
| C  | -0.240033000 | -1.679615000 | -2.258378000 |
| H  | -1.055645000 | -1.197963000 | -2.819792000 |
| H  | 0.741288000  | -1.369240000 | -2.649802000 |
| C  | -0.395652000 | -3.196032000 | -2.145602000 |
| H  | -1.374546000 | -3.493982000 | -1.722207000 |
| H  | 0.410609000  | -3.664813000 | -1.548512000 |
| H  | -0.333978000 | -3.601872000 | -3.178956000 |
| H  | -0.349220000 | -1.623213000 | -0.957412000 |

(<sup>Me4</sup>POCOP)IrH(C<sub>2</sub>H<sub>5</sub>)Cl<sup>+</sup>, E = -1866.76402998319

39

|    |              |              |              |
|----|--------------|--------------|--------------|
| C  | -1.892148000 | -0.391501000 | 3.473483000  |
| C  | -1.765062000 | -0.368778000 | 2.078080000  |
| C  | -0.475925000 | -0.434963000 | 1.479187000  |
| C  | 0.679104000  | -0.590881000 | 2.295644000  |
| C  | 0.554057000  | -0.613909000 | 3.691154000  |
| C  | -0.730603000 | -0.519518000 | 4.256788000  |
| H  | -2.888030000 | -0.308397000 | 3.929622000  |
| H  | 1.453256000  | -0.702943000 | 4.315870000  |
| H  | -0.829836000 | -0.539567000 | 5.352339000  |
| O  | 1.911333000  | -0.717241000 | 1.711614000  |
| O  | -2.878905000 | -0.281411000 | 1.286368000  |
| P  | 1.994652000  | -0.332849000 | 0.047945000  |
| P  | -2.603073000 | 0.063752000  | -0.365182000 |
| Ir | -0.274882000 | -0.153481000 | -0.500425000 |
| Cl | 0.020537000  | 1.524899000  | -2.161088000 |
| C  | 3.069399000  | -1.639383000 | -0.591717000 |
| H  | 4.013798000  | -1.662332000 | -0.013583000 |
| H  | 2.553315000  | -2.615059000 | -0.518204000 |
| H  | 3.289925000  | -1.414653000 | -1.654405000 |
| C  | 2.948285000  | 1.207559000  | 0.042624000  |
| H  | 3.940766000  | 1.046529000  | 0.505899000  |
| H  | 3.059459000  | 1.532235000  | -1.011283000 |
| H  | 2.381198000  | 1.979306000  | 0.597043000  |
| C  | -3.747123000 | -1.072007000 | -1.186102000 |
| H  | -3.733091000 | -0.851958000 | -2.272286000 |
| H  | -3.420204000 | -2.114928000 | -1.015155000 |
| H  | -4.770791000 | -0.922918000 | -0.790391000 |
| C  | -3.276061000 | 1.736402000  | -0.540466000 |
| H  | -3.147439000 | 2.042826000  | -1.597865000 |
| H  | -4.347068000 | 1.750333000  | -0.260495000 |
| H  | -2.696293000 | 2.423334000  | 0.104898000  |
| C  | -0.249900000 | -1.604234000 | -2.116499000 |
| H  | -1.075153000 | -1.249052000 | -2.761613000 |
| H  | 0.720740000  | -1.394562000 | -2.603509000 |
| C  | -0.403116000 | -3.041852000 | -1.700470000 |
| H  | -1.372409000 | -3.243677000 | -1.201990000 |
| H  | 0.416262000  | -3.387277000 | -1.038542000 |
| H  | -0.370486000 | -3.678182000 | -2.614768000 |
| H  | -0.464783000 | -1.586518000 | 0.168785000  |

(<sup>Me</sup>4POCOP)Ir(C2H5)Cl, E = -1866.35665927147

38

|   |              |              |             |
|---|--------------|--------------|-------------|
| C | -1.896407000 | -0.839421000 | 3.176488000 |
| C | -1.729393000 | -0.504842000 | 1.821947000 |
| C | -0.450705000 | -0.428316000 | 1.216330000 |
| C | 0.669717000  | -0.707683000 | 2.037478000 |
| C | 0.536259000  | -1.045012000 | 3.395069000 |
| C | -0.754115000 | -1.109647000 | 3.952288000 |
| H | -2.907191000 | -0.887707000 | 3.606649000 |
| H | 1.432577000  | -1.254180000 | 3.996688000 |
| H | -0.871749000 | -1.372523000 | 5.014569000 |
| O | 1.935959000  | -0.667221000 | 1.478371000 |
| O | -2.852014000 | -0.262404000 | 1.048357000 |

|    |              |              |              |
|----|--------------|--------------|--------------|
| P  | 1.984985000  | -0.120186000 | -0.140119000 |
| P  | -2.522276000 | 0.259060000  | -0.545555000 |
| Ir | -0.232310000 | 0.105433000  | -0.712557000 |
| Cl | 0.055575000  | 1.164643000  | -2.918285000 |
| C  | 3.118627000  | -1.341764000 | -0.875213000 |
| H  | 4.051662000  | -1.399272000 | -0.281356000 |
| H  | 2.627136000  | -2.332867000 | -0.898306000 |
| H  | 3.351687000  | -1.026415000 | -1.911520000 |
| C  | 2.969388000  | 1.408200000  | 0.012714000  |
| H  | 3.927365000  | 1.209750000  | 0.532150000  |
| H  | 3.162196000  | 1.799051000  | -1.006403000 |
| H  | 2.378745000  | 2.155880000  | 0.576417000  |
| C  | -3.693445000 | -0.771110000 | -1.486449000 |
| H  | -3.683226000 | -0.439634000 | -2.543689000 |
| H  | -3.376416000 | -1.829943000 | -1.434261000 |
| H  | -4.713679000 | -0.663740000 | -1.069108000 |
| C  | -3.253056000 | 1.930664000  | -0.549333000 |
| H  | -3.193568000 | 2.332067000  | -1.580789000 |
| H  | -4.307918000 | 1.900122000  | -0.212852000 |
| H  | -2.658209000 | 2.579853000  | 0.121781000  |
| C  | -0.324182000 | -1.826871000 | -1.501708000 |
| H  | -1.154558000 | -1.787112000 | -2.236554000 |
| H  | 0.618420000  | -1.937718000 | -2.076471000 |
| C  | -0.509889000 | -2.972523000 | -0.525401000 |
| H  | -1.454968000 | -2.885502000 | 0.046791000  |
| H  | 0.318465000  | -3.035945000 | 0.208055000  |
| H  | -0.541003000 | -3.935505000 | -1.083691000 |

**TS4**, E = -1866.31613524645

38

|    |              |              |              |
|----|--------------|--------------|--------------|
| C  | -1.904384000 | -0.649770000 | 3.393676000  |
| C  | -1.745545000 | -0.435821000 | 2.012558000  |
| C  | -0.468451000 | -0.431600000 | 1.398829000  |
| C  | 0.660508000  | -0.638362000 | 2.229781000  |
| C  | 0.533414000  | -0.855007000 | 3.613778000  |
| C  | -0.755653000 | -0.862778000 | 4.177981000  |
| H  | -2.909169000 | -0.641376000 | 3.839932000  |
| H  | 1.430047000  | -1.006547000 | 4.231776000  |
| H  | -0.867609000 | -1.032997000 | 5.259884000  |
| O  | 1.919866000  | -0.606751000 | 1.670242000  |
| O  | -2.862377000 | -0.204142000 | 1.238622000  |
| P  | 1.948122000  | -0.296721000 | -0.021029000 |
| P  | -2.537709000 | 0.081110000  | -0.425840000 |
| Ir | -0.263512000 | -0.182383000 | -0.639191000 |
| Cl | 0.013149000  | 1.927044000  | -1.753784000 |
| C  | 3.028713000  | -1.665975000 | -0.566189000 |
| H  | 3.983159000  | -1.658952000 | -0.003957000 |
| H  | 2.505181000  | -2.627384000 | -0.403018000 |
| H  | 3.233685000  | -1.544339000 | -1.648746000 |
| C  | 3.008948000  | 1.181512000  | -0.105260000 |
| H  | 3.938421000  | 1.017594000  | 0.474023000  |
| H  | 3.252384000  | 1.377081000  | -1.168188000 |
| H  | 2.448198000  | 2.047780000  | 0.292359000  |
| C  | -3.715047000 | -1.098705000 | -1.175011000 |

|   |              |              |              |
|---|--------------|--------------|--------------|
| H | -3.702991000 | -0.959110000 | -2.274606000 |
| H | -3.393091000 | -2.130787000 | -0.938154000 |
| H | -4.739496000 | -0.927769000 | -0.789748000 |
| C | -3.307205000 | 1.713134000  | -0.674783000 |
| H | -3.320900000 | 1.931426000  | -1.760848000 |
| H | -4.339382000 | 1.713201000  | -0.273590000 |
| H | -2.691322000 | 2.480027000  | -0.169259000 |
| C | -0.153968000 | -1.048838000 | -2.648160000 |
| H | -0.988663000 | -0.690939000 | -3.275718000 |
| H | 0.826966000  | -0.843329000 | -3.111009000 |
| C | -0.323349000 | -2.381901000 | -2.015637000 |
| H | 0.548623000  | -3.060410000 | -2.091246000 |
| H | -1.267915000 | -2.907788000 | -2.255810000 |
| H | -0.414378000 | -2.204947000 | -0.846084000 |

(<sup>Me4</sup>POCOP)IrH(C<sub>2</sub>H<sub>4</sub>)Cl, E = -1866.36357105032

38

|    |              |              |              |
|----|--------------|--------------|--------------|
| C  | -1.880102000 | -0.304068000 | 3.461309000  |
| C  | -1.738225000 | -0.336650000 | 2.061879000  |
| C  | -0.474673000 | -0.453128000 | 1.450358000  |
| C  | 0.661739000  | -0.537706000 | 2.278233000  |
| C  | 0.556163000  | -0.507972000 | 3.680958000  |
| C  | -0.722443000 | -0.391455000 | 4.255522000  |
| H  | -2.879208000 | -0.209979000 | 3.910247000  |
| H  | 1.461262000  | -0.573008000 | 4.301600000  |
| H  | -0.819171000 | -0.366984000 | 5.351757000  |
| O  | 1.913021000  | -0.646509000 | 1.699097000  |
| O  | -2.867245000 | -0.246337000 | 1.268104000  |
| P  | 1.938600000  | -0.660461000 | -0.008547000 |
| P  | -2.590738000 | -0.279053000 | -0.416999000 |
| Ir | -0.290325000 | -0.445778000 | -0.588990000 |
| Cl | -0.097446000 | 2.085408000  | -0.350686000 |
| C  | 2.845514000  | -2.206310000 | -0.335197000 |
| H  | 3.808917000  | -2.212933000 | 0.211333000  |
| H  | 2.219830000  | -3.061841000 | -0.017579000 |
| H  | 3.037883000  | -2.282305000 | -1.424242000 |
| C  | 3.119580000  | 0.675244000  | -0.366992000 |
| H  | 4.025630000  | 0.570902000  | 0.261013000  |
| H  | 3.397226000  | 0.617771000  | -1.438694000 |
| H  | 2.603505000  | 1.636238000  | -0.177315000 |
| C  | -3.668481000 | -1.657321000 | -0.924806000 |
| H  | -3.674272000 | -1.714825000 | -2.031819000 |
| H  | -3.259425000 | -2.600412000 | -0.515452000 |
| H  | -4.701257000 | -1.497044000 | -0.557944000 |
| C  | -3.451290000 | 1.229190000  | -0.957050000 |
| H  | -3.537964000 | 1.205498000  | -2.061962000 |
| H  | -4.459741000 | 1.283776000  | -0.502892000 |
| H  | -2.826095000 | 2.093593000  | -0.660983000 |
| C  | -0.047035000 | 0.096530000  | -2.782085000 |
| H  | -0.906670000 | 0.721308000  | -3.068799000 |
| H  | 0.940500000  | 0.567819000  | -2.901063000 |
| C  | -0.171259000 | -1.294868000 | -2.689026000 |
| H  | 0.716399000  | -1.943871000 | -2.753315000 |
| H  | -1.127653000 | -1.790159000 | -2.919927000 |

H -0.439061000 -2.022067000 -0.428358000

C<sub>2</sub>H<sub>6</sub>, E = -79.736628080489

8

C -0.296283000 -1.734219000 -2.098994000

H 0.710471000 -2.198654000 -2.148210000

H -1.021849000 -2.544570000 -1.878691000

C -0.643717000 -1.004528000 -3.396145000

H 0.081940000 -0.194320000 -3.616696000

H -1.650410000 -0.539942000 -3.347165000

H -0.641386000 -1.693730000 -4.266023000

H -0.298600000 -1.045250000 -1.228937000

C<sub>2</sub>H<sub>4</sub>, E = -78.505949099104

8

C -0.194855000 -1.289175000 -2.832346000

H 0.692114000 -1.933573000 -2.710533000

H -1.174052000 -1.796358000 -2.859284000

C -0.087950000 0.044151000 -2.942250000

H -0.974942000 0.688514000 -3.064068000

H 0.891270000 0.551285000 -2.915313000

(<sup>Me</sup>4POCOP)IrH<sub>2</sub>, E = -1328.31719036285

32

C -1.886558000 -0.333597000 3.463587000

C -1.747068000 -0.345361000 2.062606000

C -0.473669000 -0.450570000 1.447263000

C 0.670331000 -0.544199000 2.280212000

C 0.559071000 -0.534691000 3.683746000

C -0.724282000 -0.429100000 4.250763000

H -2.882430000 -0.251462000 3.921618000

H 1.457800000 -0.608321000 4.312387000

H -0.822287000 -0.420848000 5.347636000

O 1.913327000 -0.646250000 1.707497000

O -2.868614000 -0.252864000 1.277066000

P 1.913075000 -0.649742000 -0.023843000

P -2.561494000 -0.277156000 -0.426599000

Ir -0.289914000 -0.466720000 -0.609422000

C 2.868346000 -2.178117000 -0.322480000

H 3.807539000 -2.163564000 0.264828000

H 2.252053000 -3.050846000 -0.034852000

H 3.101073000 -2.240150000 -1.403977000

C 3.110079000 0.695934000 -0.329592000

H 4.034491000 0.527442000 0.257109000

H 3.348409000 0.712743000 -1.411542000

H 2.648764000 1.660869000 -0.046216000

C -3.687996000 -1.629048000 -0.917061000

H -3.732299000 -1.663558000 -2.023644000

H -3.285139000 -2.588620000 -0.541378000

H -4.700935000 -1.452409000 -0.504774000

C -3.445389000 1.245171000 -0.915136000

H -3.480852000 1.289455000 -2.021688000

H -4.474528000 1.239352000 -0.505308000

H -2.888649000 2.122969000 -0.536056000

|   |              |              |              |
|---|--------------|--------------|--------------|
| H | -0.221671000 | -1.208150000 | -2.050838000 |
| H | -0.101139000 | 0.253922000  | -2.050398000 |

(<sup>Me4</sup>POCOP)Ir, E = -1327.10462583263

30

|    |              |              |              |
|----|--------------|--------------|--------------|
| C  | -1.914015000 | -0.420740000 | 3.490578000  |
| C  | -1.758924000 | -0.300275000 | 2.099495000  |
| C  | -0.477755000 | -0.337575000 | 1.480586000  |
| C  | 0.649121000  | -0.502588000 | 2.334287000  |
| C  | 0.512397000  | -0.624576000 | 3.727172000  |
| C  | -0.772943000 | -0.582675000 | 4.296983000  |
| H  | -2.924931000 | -0.386060000 | 3.922459000  |
| H  | 1.413229000  | -0.750371000 | 4.345533000  |
| H  | -0.887140000 | -0.677482000 | 5.387417000  |
| O  | 1.912397000  | -0.544164000 | 1.779716000  |
| O  | -2.881578000 | -0.141266000 | 1.312462000  |
| P  | 1.934916000  | -0.384567000 | 0.074021000  |
| P  | -2.549924000 | -0.006510000 | -0.363051000 |
| Ir | -0.275044000 | -0.169210000 | -0.455168000 |
| C  | 2.917547000  | -1.860373000 | -0.378198000 |
| H  | 3.865249000  | -1.883451000 | 0.196026000  |
| H  | 2.322289000  | -2.769157000 | -0.168159000 |
| H  | 3.140274000  | -1.817952000 | -1.463270000 |
| C  | 3.128826000  | 0.989636000  | -0.109847000 |
| H  | 4.062515000  | 0.767580000  | 0.444438000  |
| H  | 3.356568000  | 1.117931000  | -1.187083000 |
| H  | 2.669463000  | 1.920302000  | 0.273874000  |
| C  | -3.658021000 | -1.305986000 | -1.019986000 |
| H  | -3.658640000 | -1.243824000 | -2.126739000 |
| H  | -3.272282000 | -2.297329000 | -0.715371000 |
| H  | -4.688799000 | -1.163553000 | -0.638399000 |
| C  | -3.442247000 | 1.543557000  | -0.748641000 |
| H  | -3.435237000 | 1.691408000  | -1.847226000 |
| H  | -4.488423000 | 1.487717000  | -0.387107000 |
| H  | -2.917490000 | 2.391056000  | -0.268271000 |

**TS6**, E = -1406.84896048054

38

|    |              |              |              |
|----|--------------|--------------|--------------|
| C  | -1.920420000 | -0.429429000 | 3.497620000  |
| C  | -1.758598000 | -0.324201000 | 2.103364000  |
| C  | -0.482244000 | -0.379304000 | 1.489462000  |
| C  | 0.644056000  | -0.526701000 | 2.337247000  |
| C  | 0.516106000  | -0.634741000 | 3.734818000  |
| C  | -0.772994000 | -0.586643000 | 4.296682000  |
| H  | -2.925549000 | -0.384294000 | 3.941132000  |
| H  | 1.410984000  | -0.749571000 | 4.363349000  |
| H  | -0.886195000 | -0.669533000 | 5.388820000  |
| O  | 1.903290000  | -0.554896000 | 1.776968000  |
| O  | -2.874234000 | -0.152172000 | 1.312019000  |
| P  | 1.920092000  | -0.396353000 | 0.061406000  |
| P  | -2.535636000 | -0.019903000 | -0.372023000 |
| Ir | -0.272766000 | -0.235324000 | -0.540303000 |
| C  | 2.940710000  | -1.854242000 | -0.369099000 |
| H  | 3.891554000  | -1.849824000 | 0.199771000  |



|   |              |              |              |
|---|--------------|--------------|--------------|
| H | 2.367967000  | -2.773348000 | -0.141276000 |
| H | 3.156452000  | -1.825974000 | -1.456029000 |
| C | 3.078576000  | 1.007064000  | -0.119158000 |
| H | 4.010765000  | 0.818823000  | 0.449381000  |
| H | 3.315636000  | 1.131135000  | -1.194812000 |
| H | 2.587393000  | 1.927805000  | 0.248418000  |
| C | -3.680532000 | -1.295798000 | -1.015053000 |
| H | -3.674552000 | -1.249637000 | -2.122604000 |
| H | -3.321791000 | -2.292973000 | -0.696221000 |
| H | -4.709416000 | -1.125765000 | -0.640576000 |
| C | -3.389829000 | 1.552727000  | -0.748056000 |
| H | -3.391025000 | 1.698267000  | -1.846898000 |
| H | -4.432339000 | 1.529300000  | -0.373523000 |
| H | -2.834061000 | 2.385009000  | -0.276295000 |
| C | -0.094351000 | -0.646860000 | -2.770592000 |
| H | -0.896660000 | -0.219994000 | -3.406874000 |
| H | 0.865849000  | -0.359686000 | -3.246527000 |
| C | -0.216756000 | -2.175838000 | -2.745945000 |
| H | -0.153172000 | -2.577580000 | -3.785005000 |
| H | -1.183314000 | -2.515329000 | -2.322492000 |
| H | 0.593274000  | -2.654341000 | -2.159843000 |
| H | -0.064810000 | 0.627382000  | -1.903685000 |

(<sup>Me4</sup>POCOP)IrH(C<sub>2</sub>H<sub>5</sub>), E = -1406.86080378473

38

|    |              |              |              |
|----|--------------|--------------|--------------|
| C  | -1.897378000 | -0.559431000 | 3.425597000  |
| C  | -1.738311000 | -0.417571000 | 2.034063000  |
| C  | -0.471164000 | -0.451927000 | 1.417435000  |
| C  | 0.654521000  | -0.617850000 | 2.249566000  |
| C  | 0.538541000  | -0.763303000 | 3.644994000  |
| C  | -0.747101000 | -0.735117000 | 4.218308000  |
| H  | -2.901680000 | -0.529054000 | 3.873085000  |
| H  | 1.438534000  | -0.892170000 | 4.264043000  |
| H  | -0.854669000 | -0.848767000 | 5.308093000  |
| O  | 1.913478000  | -0.631958000 | 1.668134000  |
| O  | -2.858898000 | -0.232406000 | 1.238426000  |
| P  | 1.932960000  | -0.383073000 | -0.030275000 |
| P  | -2.535564000 | -0.008105000 | -0.432631000 |
| Ir | -0.269478000 | -0.263796000 | -0.648652000 |
| C  | 3.000330000  | -1.774586000 | -0.546189000 |
| H  | 3.941233000  | -1.779678000 | 0.038633000  |
| H  | 2.456612000  | -2.725791000 | -0.388676000 |
| H  | 3.233871000  | -1.665170000 | -1.624191000 |
| C  | 3.022281000  | 1.077747000  | -0.143212000 |
| H  | 3.958384000  | 0.908488000  | 0.424540000  |
| H  | 3.259106000  | 1.264757000  | -1.209479000 |
| H  | 2.483663000  | 1.954180000  | 0.264472000  |
| C  | -3.708831000 | -1.212048000 | -1.150648000 |
| H  | -3.728601000 | -1.078790000 | -2.250858000 |
| H  | -3.363689000 | -2.237424000 | -0.916808000 |
| H  | -4.725704000 | -1.055963000 | -0.739625000 |
| C  | -3.332271000 | 1.610477000  | -0.713747000 |
| H  | -3.342304000 | 1.819459000  | -1.801952000 |
| H  | -4.369141000 | 1.605066000  | -0.323678000 |

|   |              |              |              |
|---|--------------|--------------|--------------|
| H | -2.738206000 | 2.391782000  | -0.202738000 |
| C | -0.110812000 | -0.673380000 | -2.770076000 |
| H | -0.936022000 | -0.328925000 | -3.419849000 |
| H | 0.863340000  | -0.480456000 | -3.255499000 |
| C | -0.276189000 | -2.087908000 | -2.264612000 |
| H | 0.596931000  | -2.750364000 | -2.427169000 |
| H | -1.203434000 | -2.598645000 | -2.591726000 |
| H | -0.391586000 | -2.170701000 | -1.080227000 |
| H | -0.150986000 | 1.308810000  | -0.491740000 |

(Me<sup>4</sup>POCOP)IrH(C<sub>2</sub>H<sub>4</sub>)H, E = -1406.87347328231

38

|    |              |              |              |
|----|--------------|--------------|--------------|
| C  | -1.882848000 | -0.331240000 | 3.480712000  |
| C  | -1.737983000 | -0.343582000 | 2.080811000  |
| C  | -0.475576000 | -0.450472000 | 1.468147000  |
| C  | 0.658082000  | -0.545876000 | 2.296560000  |
| C  | 0.552407000  | -0.536443000 | 3.699981000  |
| C  | -0.726550000 | -0.428590000 | 4.276436000  |
| H  | -2.883227000 | -0.246788000 | 3.929131000  |
| H  | 1.457342000  | -0.612215000 | 4.319941000  |
| H  | -0.824479000 | -0.419941000 | 5.372830000  |
| O  | 1.907953000  | -0.651273000 | 1.711501000  |
| O  | -2.864062000 | -0.248036000 | 1.281837000  |
| P  | 1.924914000  | -0.652408000 | 0.001228000  |
| P  | -2.577522000 | -0.273618000 | -0.404179000 |
| Ir | -0.291674000 | -0.465482000 | -0.587990000 |
| C  | 2.872367000  | -2.174753000 | -0.335723000 |
| H  | 3.834779000  | -2.168184000 | 0.212849000  |
| H  | 2.261659000  | -3.045597000 | -0.031737000 |
| H  | 3.067933000  | -2.234483000 | -1.425389000 |
| C  | 3.111994000  | 0.691643000  | -0.335762000 |
| H  | 4.060268000  | 0.526617000  | 0.212597000  |
| H  | 3.314421000  | 0.717556000  | -1.425558000 |
| H  | 2.653833000  | 1.651875000  | -0.032602000 |
| C  | -3.687118000 | -1.625526000 | -0.924204000 |
| H  | -3.692758000 | -1.671380000 | -2.031933000 |
| H  | -3.291482000 | -2.579190000 | -0.526949000 |
| H  | -4.717475000 | -1.452416000 | -0.555955000 |
| C  | -3.448922000 | 1.241301000  | -0.927879000 |
| H  | -3.446679000 | 1.283374000  | -2.035819000 |
| H  | -4.493860000 | 1.241716000  | -0.560096000 |
| H  | -2.901352000 | 2.118002000  | -0.533758000 |
| C  | -0.043099000 | 0.227466000  | -2.695285000 |
| H  | -0.896438000 | 0.854002000  | -2.999672000 |
| H  | 0.942841000  | 0.698874000  | -2.833229000 |
| C  | -0.162029000 | -1.184194000 | -2.697613000 |
| H  | 0.731302000  | -1.813203000 | -2.837729000 |
| H  | -1.108252000 | -1.658065000 | -3.003289000 |
| H  | -0.449900000 | -2.125063000 | -0.414132000 |
| H  | -0.165227000 | 1.196496000  | -0.411477000 |
